# Supplementary material for: Predicting Grizzly Bear Density in Western North America
Source: PLoS One. 2013 Dec 18;8(12):e82757. doi: 10.1371/journal.pone.0082757 (PMC3867401; doi:10.1371/journal.pone.0082757)
Supplement: Appendix S2 — Raw data. (XLS) [file pone.0082757.s002.xls]

## Sheet: interior
NAME	Type	Salmon_presence	blackbear	Alaska	Arctic	Park	Year	Bias	Density_naïve	LCI_den	UCI_den	POP_SIZE	LCI_Nhat	UCI_Nhat	Density_corrected	LCL_corrected	UCL_corrected	CI_relative	harv10	SALMON_AVG	MEAT_AVG	KOKAN_AVG	fish_all	allmeat	PRECIP	NDVI_AVG	AET_POLY	TEMP_AVG	TREE10PCT_	TREE25PCT_	HERB100PCT	HERB75PCT_	HERB50PCT_	HUMAN_CNT	CATTLE_CNT	SHEEP_CNT	hum_den	livestock_den	humcow_density	humcow10_density	humcow50_density	HUMANBUF10	HUMANBUF50	CATTLBUF10	CATTLBUF50	SHEEPBUF10	SHEEPBUF50	AREA_KM2	AREA10_KM2
Alberta BMA 4	M	0	1	0	0	N	2005	U				37.4	33	44	3.35739	2.96241	3.94988	0.294118	8.6	0	0.3809	0	0	0.3809	67.6677	131.861	388.988	-0.5684	82.8355	78.8636	0.2277	10.4041	27.7674	14430	63001	4753	1.29538	6.08227	7.37765									11285.8
Alberta BMA 5	M	0	1	0	0	N	2006	U				40	26	65	4.45262	2.8942	7.23551	0.975	6	0	0.4071	0	0	0.4071	58.4754	128.529	439.563	1.5632	37.3546	31.5508	0.32	42.7912	76.5595	38021	342836	10994	4.23233	39.3868	43.6191									9003.48
Alberta BMA 6	M	0	1	0	0	N	2007	U				34	23	58	11.0631	7.48389	18.8724	1.02941	7.4	0	0.3464	0	0	0.3464	81.0306	130.564	438.337	0.7935	46.0456	41.4646	0.5126	45.8584	70.5858	11864	68958	5110	3.86038	24.1007	27.9611									3082.77
ALSEK	M	0	1	0	0	N	1969	H	30	25.5	47.3	31.8714			38.8477	33.0205	61.2498	0.726667	0	0	0.148	0	0	0.148	54.4907	103.732	186.209	-5.9677	47.7715	34.7558	0.1185	18.2314	61.854	3			0.00365666	0	0.00365666	0.171489	0.0616154	548	619					1062.38	2775.65
BANFF	M	0	1	0	0	Y	1995	L	12			82.572	41	164	14.2741	7.0876	28.3504	1.48961	1.57	0	0.33	0	0	0.33	123.341	109.154	332.649	-3.9254	47.756	40.5062	0.0037	5.8122	41.2049	8641	92	20	1.49376	0.0193613	1.51312	1.87795	2.25667	19788	48387	1632	44076	503	4164	6880.96	12754.5
BERLAND	M	0	1	0	0	N	1981-83	L	5.8			58.4173	29	116	5.81009	2.88429	11.5372	1.48928	7.9	0	0.3159	0	0	0.3159	64.8241	133.965	349.822	-0.1507	99.7042	99.1947	0	0.4176	6.8948	189	847	1334	0.0187976	0.216919	0.235716	0.253755	1.02912	473	28349	1428	24462	1914	4835	10072	14354.2
BOWRON	M	1	1	0	0	N	2001	U	30.9	25.7	42.3	76	63	104	30.5745	25.3447	41.8388	0.539474	1.47511	0.04	0.11	0.15	0.115	0.225	92.8557	126.13	401.724	0.0548	98.5436	95.3998	0.1004	4.1181	26.808	106	367	137	0.0426434	0.202757	0.245401	0.267115	0.782837	351	6890	687	10606	270	1724	2495.97	4728.88
CABINET YAAK	M	0	1	0	0	N	2000	L	6.5			43.4647	22	88	6.51438	3.2973	13.1892	1.51847	1.15	0	0.1816	0	0	0.1816	106.165	135.743	415.684	3.6667	96.5774	93.8971	0.0825	3.5912	20.7865	10717	8959	8604	1.60624	2.6323	4.23853	4.8626	5.15917	30686	100960	18309	63598	15362	40666	6686.88	12648
Central Purcell	M	0	1	0	0	N	2000	U				85	65	117	19.5853	14.977	26.9586	0.611765	2.8	0	0.0866	0.0001	5e-05	0.08665	115.489	120.79	286.353	-0.875	69.8273	60.9013	0.0218	8.3047	47.3053	4437	893	29	1.02235	0.212443	1.2348									4619.04
CROWSNEST HWY 2002	M	0	1	0	0	N	2002	L				33	17	66	36.6618	18.8864	73.3236	1.48485	5.77	0	0.294	0	0	0.294	77.146	130.751	434.439	-0.8519	83.3288	78.8868	0	4.3597	37.5651	1972	2786	60	2.19082	3.1618	5.35262	6.69952	11.196	10106	28294	7717	148588	336	6297	900.12	2529.53
CROWSNEST HWY 2003	M	0	1	0	0	N	2003	L				55	27	110	55.0094	27.0046	110.019	1.50909	5.72	0	0.1239	0	0	0.1239	99.1506	131.531	397.586	0.1154	86.0967	81.4374	0.347	11.0037	42.2553	8382	1352	51	8.38343	1.40324	9.78666	6.46598	6.54035	11357	49822	3558	50007	162	4505	1000.33	2849.2
Donjek	M	0	1	0	0	N		L				23	12	46	5.64493	2.94518	11.2899	1.47826	0	0	0.1064	0	0	0.1064	84.2414	90.3066	175.519	-8.7176	37.6952	23.6695	0.0259	20.3054	55.9174	89			0.0218434	0	0.0218434	0.0205464	0.0111339	121	217		23		3	5789.08	9692.95
DOWNIE	M	0	1	0	0	N	1982	L	31.3			33.9289	17	68	33.6887	16.8796	67.5186	1.50314	2.65	0	0.0996	0.0409	0.02045	0.12005	175.451	121.289	342.175	-0.5806	73.1961	62.1415	0.1388	16.0962	64.2692	51	44	0	0.0506389	0.0436885	0.0943274	0.0910892	0.530083	119	8506	104	694	1	434	1083.99	2717.45
ELK VALLEY	M	0	1	0	0	N	1997	H				150	93	286	63.0226	39.074	120.163	1.28667	2.98	0	0.11	0	0	0.11	97.122	125.025	424.415	-2.3056	75.6004	68.4375	0	5.3956	38.7566	4783	820	112	2.00958	0.39158	2.40116	2.83175	5.92103	8296	30362	7498	122907	215	5534	2401.56	5365.69
FLATHEAD	M	0	1	0	0	N	1997	L				156	73	277	44.3973	20.7756	78.8336	1.30769	4.6	0	0.12	0	0	0.12	112.05	129.693	408.515	0.3725	87.0146	81.4678	0.1138	8.7185	45.3776	8247	2122	137	2.34708	0.642907	2.98999	3.00722	8.19992	12671	60572	5253	181273	2508	18334	3513.73	6802.93
FLATHEAD	M	0	1	0	0	N	2007	U				178	129	271	50.6584	36.7131	77.126	0.797753	2.9	0	0.12	0	0	0.12	112.05	129.693	408.515	0.3725	87.0146	81.4678	0.1138	8.7185	45.3776	8247	2122	137	2.34708	0.642907	2.98999	3.00722	8.19992	12671	60572	5253	181273	2508	18334	3513.73	6802.93
FLATHEAD96	M	0	1	0	0	N	1996	H	64.6			51	26	102	64.6396	32.9535	129.279	1.4902	3.2	0	0.1673	0	0	0.1673	122.233	129.382	410.994	0.4783	85.2195	79.0352	0.0618	10.3278	50.6493	25	209	37	0.0316861	0.311791	0.343477	0.783231	8.09843	258	26048	1125	100793	749	11436	789.23	2279.32
GNP BC	M	0	1	0	0	Y	?	L	35			45.5	23	92	39.5793	20.0071	80.0285	1.51648	0	0	0.0663	0.0246	0.0123	0.0786	198.701	114.297	352.478	-3.1053	59.6929	48.2342	0.0384	15.3551	58.9059	20	24	8	0.0173975	0.027836	0.0452335	0.251393	0.805343	637	14875	357	1517	15	83	1300.34	3472.83
GNP MONTANA	M	0	1	0	0	Y	2000	U				170	119	241	42.0729	29.451	59.6445	0.717647	0.1	0	0.21	0	0	0.21	141.706	125.598	443.168	-1.2605	73.055	63.2886	0.1839	11.9245	48.8689	215	11033	5458	0.0532098	4.08131	4.13452	4.75045	9.58023	4244	95174	23194	174650	9472	34864	4138.13	7361.38
GNP MONTANA	M	0	1	0	0	Y	1967-71	H	47.3			195.734	98	392	48.4416	24.2538	97.0151	1.50204	1.03	0	0.21	0	0	0.21	141.706	125.598	443.168	-1.2605	73.055	63.2886	0.1839	11.9245	48.8689	215	11033	5458	0.0532098	4.08131	4.13452	4.75045	9.58023	4244	95174	23194	174650	9472	34864	4138.13	7361.38
GRANDBY	M	0	1	0	0	N	1997	U	8.4	5.8	18.7	37.5551			8.5628	5.91241	19.0624	1.53571	2.39158	0	0.18	0	0	0.18	79.7848	133.733	355.164	2.5076	98.4438	96.1238	0.0684	2.7019	21.929	3010	2700	601	0.6863	0.752649	1.43895	3.01383	6.16319	21760	151858	7970	52062	1388	6194	4470.84	8201.45
Grid - 2006 N	M	1	1	0	0	N	2006	U				53	48	79	15.7456	14.2601	23.4698	0.584906	0.6	0.05	0.12	0.0155	0.05775	0.17775	145.279	113.183	316	-1.5997	57.913	48.1021	0.1639	12.8815	50.0504	688	1185	81	0.204395	0.376111	0.580506									4003.13
Grid - 2007	M	1	1	0	0	N	2007	U				94	82	134	13.5549	11.8245	19.3229	0.553191	0.43	0.05	0.12	0.0214	0.0607	0.1807	95.0202	121.246	296	-2.0093	67.0104	61.5285	0.0633	6.8453	34.2675	3746	5679	48	0.540176	0.825837	1.36601									8006.03
HINTON	M	0	1	0	0	N	1999	U	17.9	12	32	95.8882			18.5187	12.4148	33.1061	1.11732	1.67	0	0.37	0.0007	0.00035	0.37035	91.6014	123.542	344.011	-2.3205	72.4996	67.0052	0.0234	4.4695	26.4426	2531	1912	513	0.488807	0.468336	0.957143	1.37867	1.05636	10616	16204	2452	6961	896	3091	5356.88	9020.26
ISKUT	M	0	1	0	0	N	2004	H	31	25.8	38.8	121.28			47.3734	39.4269	59.2932	0.419355	2.14	0	0.11	0	0	0.11	182.355	87.1445	328.767	-2.1579	39.4881	28.6635	0.2553	18.2984	47.747	12			0.00468735	0	0.00468735	0.00469792	0.00758038	22	204		0		3	3912.25	6948.39
Jasper	M	0	1	0	0	Y	1975-78	L	10.8			14.65	7	29	12.1174	5.78986	23.9866	1.50171	7.6	0	0.3095	0	0	0.3095	121.142	108.868	321.987	-4.4595	36.2645	27.7665	0	7.9069	44.7996	7	7	3	0.00578986	0.00827123	0.0140611	0.174446	0.479774	51	5385	463	2872	221	1644	1356.26	3518.7
JUMBO	M	0	1	0	0	N	1998	U				37	32	45	25.9091	22.4079	31.5111	0.351351	5.64972	0	0.0788	0	0	0.0788	138.714	113.511	278.896	-0.6383	56.5481	47.1764	0.0454	10.2801	49.1143	224	1	7	0.156855	0.00560197	0.162457	0.328479	0.842654	796	13399	518	3849	15	177	1651.33	3737.96
KANANASKIS	M	0	1	0	0	Y	1980-84	L	16.2			109.853	55	220	16.4246	8.22325	32.893	1.502	3.7	0	0.3907	0	0	0.3907	87.2581	126.867	428.9	-2.196	78.4077	72.8083	0.0185	5.289	33.1535	6251	16802	742	0.93461	2.62307	3.55768	4.9984	32.6772	12531	1020786	47187	484036	2252	17727	6781.07	10604.8
KLUANE - ROB DNA	M	0	1	0	0	Y	1996	U	32.5			26	13	52	28.5138	14.2569	57.0275	1.5	0	0	0.1192	0	0	0.1192	57.653	108.38	207.03	-5.7931	51.3567	33.7198	1.036	27.5037	77.0844	0			0	0	0	0.122935	0.0523921	368	592					1025.63	2657.9
MIDSU	M	1	1	1	0	N	1985	U	27.1	24.3	31.1	67.6408			27.0687	24.5436	31.4118	0.250923	2.6	0.1	0.34	0	0.1	0.44	67.3989	107.231	245.091	-6.4384	45.543	20.037	0.7688	60.6948	97.3336	141	30	3	0.0564257	0.013206	0.0696318	0.0769611	0.0870002	321	1577	57	220	6	27	2523.91	4801.28
MIDSU	M	1	1	1	0	N	1995	U	40.8	36	47.9	101.966			40.805	36.3609	48.3802	0.291667	5.8	0.1	0.34	0	0.1	0.44	67.3989	107.231	245.091	-6.4384	45.543	20.037	0.7688	60.6948	97.3336	141	30	3	0.0564257	0.013206	0.0696318	0.0769611	0.0870002	321	1577	57	220	6	27	2523.91	4801.28
NAHANNI	M	0	1	0	0	Y	2003	H	22.2			69.5961	35	140	26.6086	13.3815	53.526	1.5087	0	0	0.11	0	0	0.11	68.7005	100.04	235.818	-10.4176	46.4895	30.2415	0.0725	18.9211	69.7343	0			0	0	0	0	6.77719e-05	0	2					3134.96	5712.59
NATION	M	1	1	0	0	N	2003	L	5.7	5	7.1	40.8416			5.80911	5.09571	7.23591	0.368421	2.7	0	0.25	0.26	0.13	0.38	73.0097	129.987	294.347	-0.2749	99.7514	99.1406	0.0107	0.4119	6.9247	181			0.0257445	0	0.0257445	0.316029	0.373292	5394	10082		2720		266	7165.2	10999.4
NC SELKIRKS	M	0	1	0	0	N	1996	U	48.1	30	90	216.016			49.2774	30.7343	92.2029	1.2474	3.13643	0	0.03	0	0	0.03	134.202	124.356	369.149	1.7761	82.9466	74.679	0.1183	10.3965	50.8504	3447	85	88	0.786327	0.0394646	0.825792	0.816768	1.00906	5532	24923	287	3493	141	779	4490.97	7895.19
NCDE	M	0	1	0	0	N	2005	U				765	715	831	33.4429	31.257	36.3281	0.151634	4	0	0.206	0	0	0.206	111.956	130.217	422.807	1.3031	81.1247	75.2388	0.1154	10.023	44.266	21217	101054	30453	0.927526	5.74898	6.67651	7.55289	9.59595	58476	241730	147150	409394	39630	85886	23106.7	30390.4
NORDEGG-Alberta BMA 3	M	0	1	0	0	N	2004	U				42	36	55	2.53581	2.17355	3.3207	0.452381	9.3	0	0.345	0	0	0.345	69.7382	132.378	392.335	-0.2114	92.5536	90.9751	0.0104	1.1548	10.5019	13756	10933	3152	0.830538	0.850402	1.68094	2.85399	6.05481	33168	74209	49734	384237	4926	17956	16798	24578.4
PARSNIP MTNS	M	1	1	0	0	N	2000	U	48.3	43	59	310.714			49.2141	43.8138	60.1165	0.331263	1.93014	0	0.02	0	0	0.02	135.033	124.01	318.332	-1.3069	81.3586	73.2162	0.2178	16.1489	54.6176	68	673	147	0.0107705	0.12988	0.140651	0.224336	0.467982	141	8032	2146	8642	724	3868	6433	11253.7
PARSNIP PLATEAU	M	0	1	0	0	N	2000	U	16.6	10	40	50.2326			16.8395	10.1443	40.5771	1.80723	3.2	0	0.32	0	0	0.32	90.1316	131.546	333.75	0.7882	99.9171	99.5024	0.0083	0.3234	9.3955	268		2	0.0898418	0.000670461	0.0905123	0.076747	0.836937	381	15115		9229	7	514	3026.06	5651.47
PROPHET PLATEAU	M	0	1	0	0	N	1998	U	10	7	16	54.138			10.038	7.02658	16.0608	0.9	8.49806	0	0.3076	0	0	0.3076	54.6081	132.457	324.642	-2.6369	99.8472	99.5184	0.037	0.3751	3.1489	6		291	0.00111249	0.0539556	0.0550681	0.0602991	0.102412	116	357	14	2058	444	1151	5413.8	9084.54
SC SELKIRK	M	0	1	0	0	N	1996	U	18.6	12	37	104.93			19.0757	12.3069	37.9462	1.34409	3.08631	0	0.03	0	0	0.03	114.123	129.664	368.981	1.7301	89.1176	82.6154	0.0635	5.94	35.6489	15519	808	269	2.82127	0.195793	3.01707	4.14653	3.33228	40748	70843	1214	11869	332	1817	5641.38	9211.16
South Purcell	M	0	1	0	0	N	2003	U				88	69	113	12.8828	10.1013	16.5427	0.5	3.9	0	0.1211	0	0	0.1211	92.5885	130.419	320.711	0.7206	89.2246	81.1057	0.0658	7.7755	38.6875	25642	7669	273	3.75388	1.16267	4.91655									6897.65
South Selkirk	M	0	1	0	0	N	2005	U				58	50	70	14.48	12.4828	17.4759	0.344828	2.1	0.0102	0.0845	0.0084	0.0144	0.0989	113.821	134.231	354.897	2.4483	96.0295	91.1225	0.1311	5.8372	30.1473	26211	3742	31	6.54372	0.94195	7.48567									4074.17
SOUTH SELKIRKS	M	0	1	0	0	N	1985-90	L	14			54.581	27	110	14.3742	7.11058	28.969	1.52068	1.8	0	0	0	0	0	120.64	132.716	365.081	2.5217	93.4467	87.9703	0.1707	8.2146	33.4493	8667	6806	1362	2.2825	2.15108	4.43358	6.05706	5.84334	31809	106579	13243	32332	2598	9837	3898.64	7215.62
SW YUKON	M	0	1	0	0	N	1985	U	15.8			96.4299	48	192	16.9046	8.41463	33.6585	1.49331	0.75	0	0.2804	0	0	0.2804	49.5067	107.279	173.306	-4.4056	51.3419	32.9013	0.0333	28.3881	78.2547	4480			0.785366	0	0.785366	1.73868	1.08011	20795	22507		0		1	6103.16	9690.43
SWAN HILLS	M	0	1	0	0	N	1977	L	7.2			18	9	36	5.84957	2.92478	11.6991	1.5	18.5	0	0.3731	0	0	0.3731	62.6409	131.602	397.351	0.0111	99.792	98.5919	0	0.8641	12.441	1937	1360	293	0.629479	0.537185	1.16666	1.21648	4.70089	2221	30467	4353	100974	684	8005	3078.87	5847.08
SWAN MTNS	M	0	1	0	0	N	1995	L	18.3			28.0958	21	56	18.5463	13.8623	36.9661	1.24574	7.3	0	0.22	0	0	0.22	120.409	132.485	425.826	1.5814	94.2548	91.021	0.1641	6.3526	33.4865	5648	5193	2023	3.7283	4.76335	8.49165	13.0837	11.2208	35313	96656	14315	81371	5077	24969	1535.29	3852.98
TANANA	M	0	1	1	0	N	1986	U	16			81.987	41	162	16	8.00126	31.6148	1.47584	3.1	0	0.34	0	0	0.34	33.6019	111.574	225.296	-8.1892	92.8028	69.9055	0	18.3754	90.9853	116	16	7	0.0226377	0.00448851	0.0271262	0.0270283	0.0629808	188	2090	26	84	11	36	5124.19	8346.17
WATERTON	M	0	1	0	0	Y	1997	U	15	12	20	75.6267			15.0478	12.0382	20.0637	0.533333	5.83168	0	0.5	0	0	0.5	83.4114	130.599	441.637	0.1429	73.7318	67.038	0.2288	20.2407	49.264	7608	51968	3749	1.5138	11.0863	12.6001	14.3748	19.1499	11059	71917	129359	598323	7392	35227	5041.78	9697.07
WEST SLOPES 96	M	0	1	0	0	N	1996	U	18.8	12.5	37.8	77.0708			20.2078	13.436	40.6305	1.34574	2.59724	0	0	0	0	0	124.549	119.337	324.777	-1.925	69.9841	61.8141	0.0367	9.1316	47.538	6088	676	24	1.59626	0.183538	1.7798	1.45705	0.947144	6666	15317	945	2592	39	330	4099.51	6968.07
WEST SLOPES 97	M	0	1	0	0	N	1997	U	24.7	19.5	41.6	46.969			28.9243	22.835	48.7146	0.894737	1.91775	0	0	0	0	0	117.758	111.691	318.036	-2.1071	55.7559	45.9036	0.0653	12.3612	50.6207	194	19	11	0.119468	0.0184745	0.137943	1.10006	0.67078	5339	8628	207	1903	23	396	1901.58	4340.19
Yahk	M	0	1	0	0	N	2004	U				20	16	25	7.45334	5.96267	9.31668	0.45	5	0	0.1557	0	0	0.1557	69.4919	136.622	339.279	2.3038	97.4549	94.1111	0.1486	3.3253	20.5183	18573	6518	254	6.92155	2.5237	9.44525									2718.97
YELLOWSTONE	M	0	1	0	0	Y	2000	U	20			177.218	86	354	20.8854	10.1352	41.7194	1.51226	1.4	0	0.44	0	0	0.44	93.5786	116.4	409.226	0.6388	65.4935	57.8623	0.0029	8.1142	58.5633	641	24011	26801	0.0755427	5.98826	6.0638	6.50405	7.62492	4311	25972	47017	192541	36660	84012	8860.92	13355.1
PROPHET MTNS	M	0	1	0	0	N	1998	U	22.5	20	29	70.0636			23.8796	21.2263	30.7781	0.4	11.418	0	0.2449	0	0	0.2449	65.6035	116.512	274.395	-5.4022	67.7634	57.0259	0.0963	17.3822	55.3487	3		173	0.00102248	0.0589631	0.0599855	0.0599723	0.102007	5	144		1381	327	1106	3113.94	5871.77
AKR	M	0	0.5	1	0	N	1986	U	10.1	8.5	17.1	79.8194			11.5164	9.692	19.498	0.851485	9.62628	0	0.34	0	0	0.34	69.0395	98.4958	242.67	-8.2094	42.628	25.8723	0.62	38.7973	77.3258	495	24	10	0.0714188	0.00490553	0.0763243	0.0884256	0.2194	955	9722	38	156	16	46	7902.91	12173
AKR	M	0	0.5	1	0	N	1992	U	14.6	12.2	19.7	115.382			16.6474	13.9109	22.4626	0.513699	6.38667	0	0.34	0	0	0.34	69.0395	98.4958	242.67	-8.2094	42.628	25.8723	0.62	38.7973	77.3258	495	24	10	0.0714188	0.00490553	0.0763243	0.0884256	0.2194	955	9722	38	156	16	46	7902.91	12173
Denali83	M	0	0.5	1	0	Y	1983	H	32			92.79	46	186	38.881	19.275	77.9381	1.50878	0	0	0.2293	0	0	0.2293	71.3846	95.1239	235.927	-7.8571	26.1854	11.2921	0.5916	37.5804	71.6539	141	9	4	0.0590821	0.00544728	0.0645294	0.0619877	0.0548358	251	975	19	105	7	28	2899.66	5331.25
DENALI95	M	0	0.5	1	0	Y	1995	U	37.1	33.8	40.4	72.07			37.7787	34.4168	41.1372	0.177898	0	0	0.18	0	0	0.18	78.1142	107.501	276.982	-10.6786	45.8487	15.9059	0.979	66.3064	95.054	94	6	3	0.0492743	0.00471775	0.053992	0.060894	0.0504965	214	837	14	98	6	27	1942.5	4402.66
MACKENZIE MNTS	M	0	0.5	0	0	N	1973-77	L	11.6			31.4744	16	34	12.8558	6.53523	13.8874	0.571893	1.85	0	0.11	0	0	0.11	68.1796	107.076	230.643	-11.5556	18.8374	2.511	0.092	32.5147	73.3904				0	0	0	0	3.67537e-05	0	1					2713.31	4988.9
NELCHINA	M	1	0.5	1	0	N	1998	U	28.8	26.3	32.2	97.1148			29.4236	26.8695	32.8973	0.204861	8.90198	0.1072	0.3047	0	0.1072	0.4119	57.1837	105.48	209.243	-6.5051	22.1287	4.6237	0.7903	69.3478	92.4145	393	40	4	0.11907	0.013331	0.132401	0.140691	0.738948	758	22084	72	271	8	30	3372.04	6120.22
NOA	M	1	0.5	1	1	N	1987	U	17.9	15.6	21	71.9664			18.1081	15.7813	21.2441	0.301676	1.86425	0.1231	0.2017	0	0.1231	0.3248	41.5244	113.048	153.693	-9.4359	24.8195	5.1472	0.4206	75.6324	97.8909	266	37	5	0.0669305	0.010568	0.0774985	0.0785155	0.0715728	461	1424	64	214	9	31	4020.47	6863.3
UPSU	M	0	0.5	1	0	N	1979	U	14.6	8.3	35.7	28.3541			18.7015	10.6317	45.729	1.87671	6.7	0	0.3225	0	0	0.3225	98.6782	88.8627	245.431	-8.5714	25.2826	0.9892	0.1028	49.6274	74.2035	53	18	3	0.0349572	0.013851	0.0488082	0.0569086	0.0661745	145	1119	35	136	5	25	1942.06	4096.96
UPSU	M	0	0.5	1	0	N	1987	L	10.7	8.8	14.3	20.0032			13.1935	11.2721	18.3172	0.514019	20.14	0	0.3225	0	0	0.3225	98.6782	88.8627	245.431	-8.5714	25.2826	0.9892	0.1028	49.6274	74.2035	53	18	3	0.0349572	0.013851	0.0488082	0.0569086	0.0661745	145	1119	35	136	5	25	1942.06	4096.96
ANDERSON	M	0	0	0	1	N	1989	U	10.1	8.9	11.9	171.129			10.5096	9.26093	12.3826	0.29703	2.10795	0	0.5601	0	0	0.5601	15.9767	106.122	169.582	-13.3499	19.1912	1.4359	0.0534	69.5166	97.8339				0	0	0	0	0.000654435		60					16943.5	24227.2
ANWR	M	0	0	1	1	Y	1985	L	15.9			115	86	230	20.379	15.24	40.758	1.25218	0.0946223	0	0.32	0	0	0.32	22.8757	82.0222	97.0131	-8.7667	0.2922	0.0044	0.0392	16.2487	96.0795	43	53	8	0.00761998	0.0108097	0.0184297	0.017839	0.0112665	55	117	72	162	10	23	7232.69	11519.4
BROCK-HORNADAY	M	0	0	0	1	N	1992-93	U	8.5			107.506	54	216	8.95366	4.4974	17.9896	1.50689	0	0	0.5817	0	0	0.5817	16.8	103.362	147.351	-12.879	7.1898	1.6461	0	29.8063	93.2688	286			0.0238195	0	0.0238195	0.0202553	0.0116889	286	286					12647.8	17985.8
CORONATION GULF	M	0	0	0	1	N	1991	U	4.5			97.5771	49	195	4.67943	2.34985	9.35146	1.49625	2	0	0.5806	0	0	0.5806	24.9	101.906	167.958	-10.8272	6.2438	0.872	0.0012	76.5606	98.8541				0	0	0	0	0							21683.8	28253.9
EBKR	M	0	0	1	1	N	1975	L	6.8			30.5801	23	61	9.58566	7.2096	19.1211	1.24264	0.221249	0	0.3861	0	0	0.3861	45.6591	88.2015	99.7009	-16.8769	5.6776	0.647	0	17.256	49.3698	28	42	6	0.00877691	0.0150461	0.023823	0.0232996	0.0182208	50	174	75	250	11	37	4497.07	8054.39
LAC DE GRAS	M	0	0	0	1	N	1999	L	3.5			39.0474	20	80	4.54907	2.33003	9.32011	1.5366	1.6	0	0.5593	0	0	0.5593	27.2	93.1176	147.058	-10.7295	15.6567	5.0268	0.0902	82.2302	99.1355				0	0	0	0	0							11156.4	15692.7
NOME	M	1	0	1	1	N	1991	U	29.1	26.1	33.4	52.8086			29.7093	26.6465	34.0994	0.250859	6.02882	0.14	0	0	0.14	0.14	58.2745	111.807	157.186	-5.5472	3.0032	0.1956	1.6203	88.8811	97.0247	2478	17	2	1.39408	0.0106891	1.40477	1.18814	0.4296	3312	3996	30	94	4	13	1814.73	3905.59
NORTH YUKON	M	0	0	0	1	N	1974	H	28			75.9091	38	152	28.0777	14.0556	56.2226	1.5018	0	0	0.4393	0	0	0.4393	28.1518	112.964	122.751	-12.2785	4.5082	0.1198	0.4702	72.5638	97.603				0	0	0	0	0							2711.04	5104.98
RICHARDSON MTNS	M	0	0	0	1	N	1995	U	19			138.335	69	276	19.1523	9.55298	38.2119	1.49637	0	0	0.4621	0	0	0.4621	35.5103	113.219	140.817	-12.375	10.2483	1.0331	1.7012	76.2905	96.7905				0	0	0	0	0.0269522		1393					7280.84	11310.7
TUKTOYUKTUK	M	0	0	0	1	N	1977	L	4.5			65.7941	33	132	5.92805	2.9733	11.8932	1.50469	10.6504	0	0.5286	0	0	0.5286	17.6872	77.2139	186.56	-9.7643	35.4404	10.2852	0.5774	49.8557	88.6677	419			0.0377519	0	0.0377519	0.166963	0.0942281	3824	3824					14620.9	23846.4
WBKR	M	0	0	1	1	N	1980	L	22.8			141.41	106	212	22.87	17.1432	34.2863	0.749591	0.310641	0	0.36	0	0	0.36	44.6715	108.148	119.987	-12.4144	1.1124	0.0242	0	78.7764	98.5652	100	58	8	0.0161728	0.0106741	0.0268469	0.027528	0.0303404	168	635	91	277	13	40	6202.21	9797.83
WBKR	M	0	0	1	1	N	1992	U	29.5	28.1	31.5	182.965			29.5906	28.1863	31.5967	0.115254	0.563473	0	0.36	0	0	0.36	44.6715	108.148	119.987	-12.4144	1.1124	0.0242	0	78.7764	98.5652	100	58	8	0.0161728	0.0106741	0.0268469	0.027528	0.0303404	168	635	91	277	13	40	6202.21	9797.83
YUKON NORTH SLOPE	M	0	0	0	1	N	2006	U				160	120	240	32.4264	24.3198	48.6396	0.75	1.4	0	0.49	0	0	0.49	20.1086	107.742	124.199	-10.5762	2.3508	0.1261	0.4288	67.5478	97.6441				0	0	0	0	0		0		0		0	5078.49	8565.14
Cariboo	U2	1	1	0	0	N			0			0	0	10	0	0	1.44651	1	3.7	0.1021	0.1247	0	0.1021	0.2268	54.1302	136.076	340	1.36	98.6176	97.5283	0.2606	2.0447	14.508	23090	20880	1458	3.34	3.23122	6.57122									6983.22
Central Alberta	U2	0	0	0	0	N			0			0	0	5	0	0	0.766828	0.5	3.7	0	0.464	0	0	0.464	51.349	128.195	420	2.401	21.4634	15.4619	3.6622	82.7472	93.569	57812	334378	12387	8.86637	53.1818	62.0482									6525.87
Flathead Lake	U2	0	1	0	0	N			0			0	0	10	0	0	1.5522	1	3.7	0	0.2133	0	0	0.2133	59.0956	125.545	389	4.0051	80.9223	74.0731	0.2599	15.2343	52.1758	50463	19716	8962	7.83287	4.4514	12.2843									6801.28
Lake Athabasca	U2	0	1	0	0	N			0			0	0	5	0	0	0.632317	0.5	3.7	0	0.4	0	0	0.4	45.2	114.795	228	-5.004	96.7123	87.611	0.0032	1.6091	67.5307	500	0	0	0.0632317	0	0.0632317									8479.19
NCAlberta	U2	0	1	0	0	N			0			0	0	5	0	0	0.753028	0.5	3.7	0	0.4689	0	0	0.4689	47.9482	135.545	372	-1.0816	99.9285	99.6652	0	0.1655	6.7785	83	0	0	0.0125003	0	0.0125003									6737.77
PEACE	U2	0	1	0	0	N	2003		0			0	0	10	0	0	1.78902	1	3.7	0	0.1807	0	0	0.1807	48.2474	127.392	339.696	0.8841	73.3181	58.5525	1.8832	38.6652	63.4371	26842	47544	883	4.80209	8.66369	13.4658	11.5752	8.73161	28547	53528	64675	149895	1498	5380	5609.4	9120.27
Peace River	U2	0	1	0	0	N			0			0	0	5	0	0	0.627428	0.5	3.7	0	0.3932	0	0	0.3932	46.6535	129.684	291	-2.0962	88.6891	84.4749	0.047	10.2676	31.373	7664	12720	85	0.961722	1.60684	2.56857									8156.31
South Chilicotin	U2	1	1	0	0	N			0			0	0	10	0	0	1.11619	1	3.7	0.0969	0.149	0	0.0969	0.2459	43.2931	133.126	312	0.9389	89.3554	84.1781	0.223	6.9588	31.0862	16624	30409	496	1.85555	3.44958	5.30513									8998.28
South Okanagan	U2	0	1	0	0	N			0			0	0	5	0	0	1.25407	0.5	3.7	0	0.1489	0.0265	0.01325	0.16215	59.7371	132.345	307	2.2435	94.5472	87.3704	0.2124	8.3573	31.5865	4750	8050	686	1.19137	2.19112	3.38248									3990.99
SW Alberta Foothills	U2	0	0	0	0	N			0			0	0	10	0	0	2.55577	1	3.7	0	0.3182	0	0	0.3182	56.9197	126.915	440	2.2881	11.3326	8.4387	0.5047	58.8092	93.976	10141	150094	7281	2.59181	40.2215	42.8133									3925.71
Thompson	U2	1	1	0	0	N			0			0	0	10	0	0	2.16162	1	3.7	0.0165	0.174	0.051	0.042	0.216	58.7056	133.271	300	4.6241	89.8194	85.6618	1.9518	12.6892	28.963	98969	42608	7669	21.3933	10.868	32.2612									4789.75
Upper Columbia	U2	0	1	0	0	N			0			0	0	5	0	0	0.701945	0.5	3.7	0	0.17	0	0	0.17	68.2337	133.778	371	4.7204	91.1861	77.3807	0.4072	16.9609	41.0369	25794	24988	2401	3.62119	3.84511	7.4663									7244.08
Wbnp	U2	0	1	0	0	Y			0			0	0	10	0	0	1.24838	1	3.7	0	0.4118	0	0	0.4118	43.985	127.549	273	-4.7915	98.8608	85.774	0.0187	11.4794	68.1273	3	0	66	0.000374515	0.00823932	0.00861383									8065.87
Westlock	U2	0	1	0	0	N			0			0	0	5	0	0	1.13395	0.5	3.7	0	0.4813	0	0	0.4813	49.7036	127.717	400	1.4122	48.007	30.2701	2.2213	67.7341	84.3153	14538	120446	6661	3.29708	28.8267	32.1238									4433.97
[truncated: 9 more columns]

## Sheet: coast_BB
coast	Type	Salmon_presence	blackbear	Alaska	Arctic	Park	Year	Bias	Density_naïve	LCI_den	UCI_den	POP_SIZE	LCI_Nhat	UCI_Nhat	Density_corrected	LCL_corrected	UCL_corrected	CI_relative	harv10	SALMON_AVG	MEAT_AVG	KOKAN_AVG	fish_all	allmeat	PRECIP	NDVI_AVG	AET_POLY	TEMP_AVG	TREE10PCT_	TREE25PCT_	HERB100PCT	HERB75PCT_	HERB50PCT_	HUMAN_CNT	CATTLE_CNT	SHEEP_CNT	hum_den	livestock_den	humcow_density	humcow10_density	humcow50_density	HUMANBUF10	HUMANBUF50	CATTLBUF10	CATTLBUF50	SHEEPBUF10	SHEEPBUF50	AREA_KM2	AREA10_KM2
Berners Bay	T	2	1	1	0	N	2006	L				60	47	96	64.2254	50.3099	102.761	0.816667	2.8	0.3055	0.1343	0	0.3055	0.4398	323.35	75.1622	345	0.7004	40.5437	27.9875	0.9779	22.8633	51.105	338	0	2	0.361803	0.00214085	0.363944									1363.69
Fraser Valley	U2	2	1	0	0	N			0			0	0	5	0	0	2.74109	0.5	2.3	0.25	0	0	0.25	0.25	233.421	130.072	474	6.7037	91.2055	86.7671	2.1233	12.2329	20.8493	100381	29592	3150	55.0307	17.9498	72.9805									1837.59
GMU 9B	M	2	1	1	0	N	2000	U	38.6	24.5	38.8	352.343			47.7941	30.3357	48.0418	0.370466	0.9	0.71	0	0	0.71	0.71	127.921	97.9948	262.531	-2.5858	44.2464	27.7715	1.9097	38.6297	71.5967	234	69	12	0.0317413	0.0109874	0.0427287	0.042166	0.0322712	360	872	104	252	20	52	9128.06	14976.4
Grid - 2004	T	2	1	0	0	N	2004	U				90	75	142	11.5391	9.61593	18.2062	0.744444	0	0.21	0.032	0.0065	0.21325	0.24525	282.454	115.846	386	1.6229	68.711	58.9867	0.203	12.9067	43.2121	6516	355	258	0.835432	0.0785942	0.914026									9006.29
Grid - 2005	T	2	1	0	0	N	2005	U				23	21	49	3.0555	2.7898	6.50953	1.21739	3.5	0.14	0.0854	0.0186	0.1493	0.2347	168.347	125.415	355	1.1769	77.8253	69.1284	0.1672	9.7515	45.9023	3131	2207	205	0.415946	0.320429	0.736374									7805.09
Grid - 2006 S	T	2	1	0	0	N	2006	U				0	0	10	0	0	1.57882	0.5	0	0	0.0522	0.011	0.0055	0.0577	294.1	121.632	417	2.6339	80.0323	73.0069	0.1028	8.1743	32.3557	24926	466	322	3.93536	0.124411	4.05977									6905.32
KHUTZEYMATEEN	T	2	1	0	0	Y	1991	H	77			37.3388	28	74	86.5547	64.9065	171.539	1.23196	0.2	0.78	0	0	0.78	0.78	379.707	109.16	323.777	3	49.9747	35.038	0.8608	31.5443	60.9114	8	1	1	0.0185447	0.00463618	0.0231809	0.0481703	1.19802	68	17511	7	49	9	80	484.92	1783.01
KIMDEAN	T	2	1	0	0	N	1999	L	37.9			86.3074	43	172	43.5511	21.698	86.792	1.49466	1.8	0.64	0	0	0.64	0.64	186.378	118.355	416.951	0.197	60.2785	46.4423	0.3179	20.6885	56.7043	11		0	0.00555065	0	0.00555065	0.0295946	0.110193	154	2215	17	675	15	90	2277.24	5402.46
KINGCOME	M	2	1	0	0	N	1997	U	41.6	31.4	66.5	101.924			46.5788	35.158	74.4589	0.84375	0.490581	0.69	0	0	0.69	0.69	385.717	113.811	435.679	3.4459	63.7855	51.1945	0.2461	19.2454	54.0962	96			0.0438717	0	0.0438717	0.0316225	0.0863869	101	2003		80		23	2450.09	5005.28
OWIKENO	T	2	1	0	0	N	1998	L	17			200.943	100	400	20.3926	10.1484	40.5937	1.49296	5.8	0.29	0	0	0.29	0.29	355.833	108.16	431.378	2.9625	72.514	62.6548	0.2829	14.0092	35.5654	141	5		0.0143093	0.000507422	0.0148167	0.0181464	0.0807793	219	3872	44	885		10	11820.2	16770.8
STIKINE	M	2	1	0	0	N	2004	U	22.2	14	44	138			39.2577	24.7207	77.6937	1.35135	1	0.37	0	0	0.37	0.37	273.186	78.2889	315.923	-2.125	31.3721	17.7584	1.0144	22.2052	45.5532	23	0	0	0.00654296	0	0.00654296	0.0203286	0.136669	161	5507	0	0	2	15	6207.07	10625.3
Sunshine Coast	U2	2	1	0	0	N			0			0	0	10	0	0	4.3572	1	2.3	0.25	0	0	0.25	0.25	205.458	115.071	370	5.0357	98.4863	96.8093	0.1525	2.1453	8.7989	28700	220	245	12.5052	0.20261	12.7078									2867.56
TAKU	T	2	1	0	0	N	2003	L				107	52	214	57.4527	27.921	114.905	1.51402	1.7	0.3421	0	0	0.3421	0.3421	126.113	99.2906	297.869	-0.9552	53.5904	35.3403	0.6186	27.1653	67.5652	0	0	0	0	0	0	0.00322324	0.0683969	16	1667	0	0	1	7	2334.56	4534.13
TWEEDSMUIR	T	2	1	0	0	N	1993	L	18.3			57.7004	29	116	20.0739	10.0891	40.3562	1.50779	0.43	0.64	0	0	0.64	0.64	115.184	122.277	374.047	-1.3011	72.9758	64.546	0.0079	10.7431	44.6601	145	526	5	0.0504453	0.184734	0.23518	0.246414	0.325959	245	3203	997	4492	14	83	3153.03	5679.49
Unuk-Bradfield	T	2	1	1	0	Y	2005	L				50	31	115	34.6428	21.4786	79.6785	1.68	10	0.5271	0.0657	0.03	0.5421	0.6078	472.776	99.7897	293	1.5643	52.7296	36.8356	0.7077	27.9029	57.5173	164	0	4	0.0568142	0.00138571	0.0582									3562.28
Mid Coast Mainland Only	M	2	1	0	0		2009	L				4	2	10	6.77163	3.38581	16.9291	2	5	0.38	0	0	0.38	0.38	452.819	123.332	399	3.5439	92.1025	86.2164	0.3176	9.5067	26.4451	17	0	0	0.0143897	0	0.0143897									1287.21
Toba	M	2	1	0	0	N	2008	L				65	63	71	46.7048	45.2677	51.016	0.123077	0.5	0.42	0.0245	0.0044	0.4222	0.4467	294.885	105.829	388	1.6646	57.2476	47.7135	0.2732	13.7691	40.2071	70	43	74	0.0251487	0.0420343	0.0671831									3677
MEAN									28.0667	#DIV/0!	#DIV/0!	80.7975	34.1429	70.4286	31.0938	21.0485	55.1857	1.08168	2.27768	0.408512	0.0231824	0.00414706	0.410585	0.433768	275.156	109.382	369.715	1.60498	65.1542	54.3645	0.604912	17.852	44.885	9700.06	2232.27	285.2	4.31481	1.11307	5.42788	0.0549582	0.254834	165.5	4606.25	167	804.125	10.1667	45	4480.42	8097.12
SD									24.0131	#DIV/0!	#DIV/0!	88.5889	29.0082	50.8686	25.9347	19.4568	47.2719	0.522727	2.61931	0.222135	0.0394169	0.0084269	0.221164	0.208799	111.462	15.5037	57.7379	2.49032	19.0665	23.0868	0.615667	9.60021	16.5785	24967.9	7589.88	800.909	13.4275	4.33974	17.6862	0.0786345	0.391425	109.01	5410.72	367.849	1526.73	7.57408	35.4482	3336.94	5400.78
[truncated: 9 more columns]

## Sheet: coast_no BB
NAME	Type	Salmon_presence	blackbear	Alaska	Arctic	Park	Year	Bias	Density_naïve	LCI_den	UCI_den	POP_SIZE	LCI_Nhat	UCI_Nhat	Density_corrected	LCL_corrected	UCL_corrected	CI_relative	harv10	SALMON_AVG	MEAT_AVG	KOKAN_AVG	fish_all	allmeat	PRECIP	NDVI_AVG	AET_POLY	TEMP_AVG	TREE10PCT_	TREE25PCT_	HERB100PCT	HERB75PCT_	HERB50PCT_	HUMAN_CNT	CATTLE_CNT	SHEEP_CNT	hum_den	livestock_den	humcow_density	humcow10_density	humcow50_density	HUMANBUF10	HUMANBUF50	CATTLBUF10	CATTLBUF50	SHEEPBUF10	SHEEPBUF50	AREA_KM2	AREA10_KM2
BLA	M	2	0	1	0	N	1989	U	191.3	174.6	212.4	445.05			200.684	183.164	222.819	0.197595	2.24615	0.82	0	0	0.82	0.82	127.269	112.741	314.897	0.9559	62.3971	39.9288	4.9855	49.3657	79.0786	49	21	3	0.0220953	0.0108222	0.0329174	0.0369118	0.0240212	104	308	35	101	5	14	2326.45	4877.86
UNIMAK	M	2	0	1	0	N	2002	U	102.16	69.7	140.9	425.216			123.521	84.2741	170.362	0.696946	3.24351	0.7845	0	0	0.7845	0.7845	116.75	85.1743	346	1.5738	50.3237	33.8697	3.4819	33.9199	66.6771	266	38	5	0.0772705	0.0124911	0.0897617	0.106286	0.0436541	422	718	39	51	6	7	4162.26	7999.43
KUSKOKWIM	T	2	0	1	1	N	1993-97	U	36.4			158.962	80	320	36.9434	18.5923	74.3693	1.50979	1.75	0.28	0.36	0	0.28	0.64	101.472	103.619	238.59	-4.5194	7.5839	1.1074	1.8902	84.4495	97.6402	424	41	6	0.0985393	0.010923	0.109462	0.108557	0.102609	678	2193	67	228	10	33	4367.09	7176.67
GMU 9D	M	2	0	1	0	N	2002	U	169.04	135.9	214	1548.92			197.684	158.929	250.263	0.462021	4.42057	0.73	0	0	0.73	0.73	111.714	95.5075	350.704	1.8127	51.1611	31.7943	6.7519	52.2466	78.7071	431	78	11	0.0550073	0.0113588	0.0663661	0.0840025	0.0522252	789	1712	85	136	12	19	9163.03	16956.4
ALIULIK	M	2	0	1	0	N	1993	U	292	270	319	104.422			324.797	300.326	354.829	0.167808	7.30002	0.5671	0	0	0.5671	0.5671	169.903	113.154	329	2	77.8462	63.1538	12.4615	36	59.5385	8	3	0	0.0248834	0.00933126	0.0342146	0.0561862	0.0202097	36	176	6	39	1	6	357.61	1621.65
KAR	M	2	0	1	0	N	1987	U	322.8	273	392.4	890.734			341.497	288.813	415.129	0.369888	6.60348	0.5677	0	0	0.5677	0.5677	115.351	114.081	328.383	1.275	61.0569	43.2031	15.202	54.5855	77.063	65	25	4	0.0249203	0.0111183	0.0360385	0.0421325	0.0248957	129	382	34	73	5	10	2759.4	6081.76
TER	M	2	0	1	0	N	1987	U	341.7	295.8	408.5	713.066			362.332	313.661	433.166	0.329821	4.77041	0.51	0	0	0.51	0.51	235.499	109.394	322.995	1.6129	53.6954	38.9888	8.7391	50.6991	70.9238	10778	19	3	5.47665	0.0111789	5.48783	4.75811	1.42458	12680	13262	28	72	4	10	2086.82	4992.45
KAT	M	2	0	1	0	Y	1990	H	550.8	450.5	693.5	1134.27			856.017	700.137	1077.79	0.441176	0	0.63	0	0	0.63	0.63	183.482	79.3246	325.944	-1	26.9855	18.8911	3.9203	29.358	50.3172	48	19	3	0.0362248	0.016603	0.0528278	0.0597539	0.0254077	101	315	31	88	5	16	2059.32	4941.73
KARLUK	T	2	0	1	0	N	1994 & 2003	U	448			102.3	51	204	452.875	225.774	903.094	1.4956	6.60348	0.5488	0	0	0.5488	0.5488	113.48	115.376	328.902	2	26.1488	13.3479	10.8315	84.2451	96.9365	5	2	0	0.0221347	0.00885387	0.0309885	0.0375063	0.031345	30	280	11	65	2	9	228.36	1279.09
CHICHIGOFF	M	2	0	1	0	N	1992	U	318.3	256.9	407.4	614.44			333.277	268.988	426.57	0.472824	2.62529	0.54	0	0	0.54	0.54	254.72	106.315	306.433	2.5357	89.2544	79.129	1.6988	18.552	39.5443	927	0	2	0.502812	0.00108482	0.503897	0.445257	1.31265	1137	30600	0	0	4	17	1930.38	4591.55
AD-2	M	2	0	1	0	N	1987	L	398.8	345.9	470.9	670.614			418.82	363.264	494.539	0.31344	1.80523	0.48	0	0	0.48	0.48	226.54	106.139	342.871	2.3265	88.583	75.7429	1.2043	22.8495	36.2058	692	0	2	0.432176	0.00124906	0.433425	0.952882	1.3165	3414	31932	0	0	3	21	1681.58	5059.15
MEAN									288.3	#DIV/0!	#DIV/0!	618.909	#DIV/0!	#DIV/0!	331.677	264.175	438.448	0.586992	3.76074	0.5871	0.0327273	0	0.5871	0.619827	159.653	103.711	321.338	0.961191	54.0942	39.9233	6.46973	46.9337	68.4211	1244.82	22.3636	3.54545	0.615702	0.00954675	0.625248	0.607962	0.398009	1774.55	7443.45	30.5455	77.5455	5.18182	14.7273	2829.3	5961.62
SD									152.745	#DIV/0!	#DIV/0!	450.205	#DIV/0!	#DIV/0!	215.316	177.78	303.618	0.474825	2.36653	0.152203	0.108544	0	0.152203	0.113297	57.1001	12.1034	30.3885	2.04959	26.0946	24.7577	4.74865	22.1129	20.6121	3176.53	23.4703	3.07778	1.62128	0.00459761	1.6214	1.40433	0.613314	3746.89	12373.9	26.9346	64.1395	3.25017	7.8242	2462.91	4160.97
[truncated: 9 more columns]

## Sheet: all data
int_coast	NAME	Type	Salmon_presence	blackbear	Alaska	Arctic	Park	Year	Bias	Density_naïve	LCI_den	UCI_den	POP_SIZE	LCI_Nhat	UCI_Nhat	Density_corrected	LCL_corrected	UCL_corrected	CI_relative	harv10	SALMON_AVG	MEAT_AVG	KOKAN_AVG	fish_all	allmeat	PRECIP	NDVI_AVG	AET_POLY	TEMP_AVG	TREE10PCT_	TREE25PCT_	HERB100PCT	HERB75PCT_	HERB50PCT_	HUMAN_CNT	CATTLE_CNT	SHEEP_CNT	hum_den	livestock_den	humcow_density	humcow10_density	humcow50_density	HUMANBUF10	HUMANBUF50	CATTLBUF10	CATTLBUF50	SHEEPBUF10	SHEEPBUF50	AREA_KM2
c	AD-2	M	2	0	1	0	N	1987	L	398.8	345.9	470.9	670.614			418.82	363.264	494.539	0.31344	1.80523	0.48	0	0	0.48	0.48	226.54	106.139	342.871	2.3265	88.583	75.7429	1.2043	22.8495	36.2058	692	0	2	0.432176	0.00124906	0.433425	0.952882	1.3165	3414	31932	0	0	3	21	1681.58
c	ALIULIK	M	2	0	1	0	N	1993	U	292	270	319	104.422			324.797	300.326	354.829	0.167808	7.30002	0.5671	0	0	0.5671	0.5671	169.903	113.154	329	2	77.8462	63.1538	12.4615	36	59.5385	8	3	0	0.0248834	0.00933126	0.0342146	0.0561862	0.0202097	36	176	6	39	1	6	357.61
c	Berners Bay	M	2	1	1	0	N	2006	L				60	47	96	64.2254	50.3099	102.761	0.816667	2.8	0.3055	0.1343	0	0.3055	0.4398	323.35	75.1622	345	0.7004	40.5437	27.9875	0.9779	22.8633	51.105	338	0	2	0.361803	0.00214085	0.363944									1363.69
c	BLA	M	2	0	1	0	N	1989	U	191.3	174.6	212.4	445.05			200.684	183.164	222.819	0.197595	2.24615	0.82	0	0	0.82	0.82	127.269	112.741	314.897	0.9559	62.3971	39.9288	4.9855	49.3657	79.0786	49	21	3	0.0220953	0.0108222	0.0329174	0.0369118	0.0240212	104	308	35	101	5	14	2326.45
c	CHICHIGOFF	M	2	0	1	0	N	1992	U	318.3	256.9	407.4	614.44			333.277	268.988	426.57	0.472824	2.62529	0.54	0	0	0.54	0.54	254.72	106.315	306.433	2.5357	89.2544	79.129	1.6988	18.552	39.5443	927	0	2	0.502812	0.00108482	0.503897	0.445257	1.31265	1137	30600	0	0	4	17	1930.38
c	Fraser Valley	U2	2	1	0	0	N			0			0	0	5	0	0	2.74109	0.5	2.3	0.25	0	0	0.25	0.25	233.421	130.072	474	6.7037	91.2055	86.7671	2.1233	12.2329	20.8493	100381	29592	3150	55.0307	17.9498	72.9805									1837.59
c	GMU 9B	M	2	1	1	0	N	2000	U	38.6	24.5	38.8	352.343			47.7941	30.3357	48.0418	0.370466	0.9	0.71	0	0	0.71	0.71	127.921	97.9948	262.531	-2.5858	44.2464	27.7715	1.9097	38.6297	71.5967	234	69	12	0.0317413	0.0109874	0.0427287	0.042166	0.0322712	360	872	104	252	20	52	9128.06
c	GMU 9D	M	2	0	1	0	N	2002	U	169.04	135.9	214	1548.92			197.684	158.929	250.263	0.462021	4.42057	0.73	0	0	0.73	0.73	111.714	95.5075	350.704	1.8127	51.1611	31.7943	6.7519	52.2466	78.7071	431	78	11	0.0550073	0.0113588	0.0663661	0.0840025	0.0522252	789	1712	85	136	12	19	9163.03
c	Grid - 2004	M	2	1	0	0	N	2004	U				90	75	142	11.5391	9.61593	18.2062	0.744444	0	0.21	0.032	0.0065	0.21325	0.24525	282.454	115.846	386	1.6229	68.711	58.9867	0.203	12.9067	43.2121	6516	355	258	0.835432	0.0785942	0.914026									9006.29
c	Grid - 2005	M	2	1	0	0	N	2005	U				23	21	49	3.0555	2.7898	6.50953	1.21739	3.5	0.14	0.0854	0.0186	0.1493	0.2347	168.347	125.415	355	1.1769	77.8253	69.1284	0.1672	9.7515	45.9023	3131	2207	205	0.415946	0.320429	0.736374									7805.09
c	Grid - 2006 S	M	2	1	0	0	N	2006	U				0	0	10	0	0	1.57882	0.5	0	0	0.0522	0.011	0.0055	0.0577	294.1	121.632	417	2.6339	80.0323	73.0069	0.1028	8.1743	32.3557	24926	466	322	3.93536	0.124411	4.05977									6905.32
c	KAR	M	2	0	1	0	N	1987	U	322.8	273	392.4	890.734			341.497	288.813	415.129	0.369888	6.60348	0.5677	0	0	0.5677	0.5677	115.351	114.081	328.383	1.275	61.0569	43.2031	15.202	54.5855	77.063	65	25	4	0.0249203	0.0111183	0.0360385	0.0421325	0.0248957	129	382	34	73	5	10	2759.4
c	KARLUK	M	2	0	1	0	N	1994 & 2003	U	448			102.3	51	204	452.875	225.774	903.094	1.4956	6.60348	0.5488	0	0	0.5488	0.5488	113.48	115.376	328.902	2	26.1488	13.3479	10.8315	84.2451	96.9365	5	2	0	0.0221347	0.00885387	0.0309885	0.0375063	0.031345	30	280	11	65	2	9	228.36
c	KAT	M	2	0	1	0	Y	1990	H	550.8	450.5	693.5	1134.27			856.017	700.137	1077.79	0.441176	0	0.63	0	0	0.63	0.63	183.482	79.3246	325.944	-1	26.9855	18.8911	3.9203	29.358	50.3172	48	19	3	0.0362248	0.016603	0.0528278	0.0597539	0.0254077	101	315	31	88	5	16	2059.32
c	KHUTZEYMATEEN	M	2	1	0	0	Y	1991	H	77			37.3388	28	74	86.5547	64.9065	171.539	1.23196	0.2	0.78	0	0	0.78	0.78	379.707	109.16	323.777	3	49.9747	35.038	0.8608	31.5443	60.9114	8	1	1	0.0185447	0.00463618	0.0231809	0.0481703	1.19802	68	17511	7	49	9	80	484.92
c	KIMDEAN	M	2	1	0	0	N	1999	L	37.9			86.3074	43	172	43.5511	21.698	86.792	1.49466	1.8	0.64	0	0	0.64	0.64	186.378	118.355	416.951	0.197	60.2785	46.4423	0.3179	20.6885	56.7043	11		0	0.00555065	0	0.00555065	0.0295946	0.110193	154	2215	17	675	15	90	2277.24
c	KINGCOME	M	2	1	0	0	N	1997	U	41.6	31.4	66.5	101.924			46.5788	35.158	74.4589	0.84375	0.490581	0.69	0	0	0.69	0.69	385.717	113.811	435.679	3.4459	63.7855	51.1945	0.2461	19.2454	54.0962	96			0.0438717	0	0.0438717	0.0316225	0.0863869	101	2003		80		23	2450.09
c	KUSKOKWIM	M	2	0	1	1	N	1993-97	U	36.4			158.962	80	320	36.9434	18.5923	74.3693	1.50979	1.75	0.38	0.14	0.1	0.43	0.57	101.472	103.619	238.59	-4.5194	7.5839	1.1074	1.8902	84.4495	97.6402	424	41	6	0.0985393	0.010923	0.109462	0.108557	0.102609	678	2193	67	228	10	33	4367.09
c	Mid Coast Mainland Only	M	2	1	0	0		2009	L				4	2	10	6.77163	3.38581	16.9291	2	5	0.38	0	0	0.38	0.38	452.819	123.332	399	3.5439	92.1025	86.2164	0.3176	9.5067	26.4451	17	0	0	0.0143897	0	0.0143897									1287.21
c	OWIKENO	M	2	1	0	0	N	1998	L	17			200.943	100	400	20.3926	10.1484	40.5937	1.49296	5.8	0.29	0	0	0.29	0.29	355.833	108.16	431.378	2.9625	72.514	62.6548	0.2829	14.0092	35.5654	141	5		0.0143093	0.000507422	0.0148167	0.0181464	0.0807793	219	3872	44	885		10	11820.2
c	STIKINE	M	2	1	0	0	N	2004	U	22.2	14	44	138			39.2577	24.7207	77.6937	1.35135	1	0.37	0	0	0.37	0.37	273.186	78.2889	315.923	-2.125	31.3721	17.7584	1.0144	22.2052	45.5532	23	0	0	0.00654296	0	0.00654296	0.0203286	0.136669	161	5507	0	0	2	15	6207.07
c	Sunshine Coast	U2	2	1	0	0	N			0			0	0	10	0	0	4.3572	1	2.3	0.25	0	0	0.25	0.25	205.458	115.071	370	5.0357	98.4863	96.8093	0.1525	2.1453	8.7989	28700	220	245	12.5052	0.20261	12.7078									2867.56
c	TAKU	M	2	1	0	0	N	2003	L				107	52	214	57.4527	27.921	114.905	1.51402	1.7	0.3421	0	0	0.3421	0.3421	126.113	99.2906	297.869	-0.9552	53.5904	35.3403	0.6186	27.1653	67.5652	0	0	0	0	0	0	0.00322324	0.0683969	16	1667	0	0	1	7	2334.56
c	TER	M	2	0	1	0	N	1987	U	341.7	295.8	408.5	713.066			362.332	313.661	433.166	0.329821	4.77041	0.51	0	0	0.51	0.51	235.499	109.394	322.995	1.6129	53.6954	38.9888	8.7391	50.6991	70.9238	10778	19	3	5.47665	0.0111789	5.48783	4.75811	1.42458	12680	13262	28	72	4	10	2086.82
c	Toba	M	2	1	0	0	N	2008	L				65	63	71	46.7048	45.2677	51.016	0.123077	0.5	0.42	0.0245	0.0044	0.4222	0.4467	294.885	105.829	388	1.6646	57.2476	47.7135	0.2732	13.7691	40.2071	70	43	74	0.0251487	0.0420343	0.0671831									3677
c	TWEEDSMUIR	M	2	1	0	0	N	1993	L	18.3			57.7004	29	116	20.0739	10.0891	40.3562	1.50779	0.43	0.64	0	0	0.64	0.64	115.184	122.277	374.047	-1.3011	72.9758	64.546	0.0079	10.7431	44.6601	145	526	5	0.0504453	0.184734	0.23518	0.246414	0.325959	245	3203	997	4492	14	83	3153.03
c	UNIMAK	M	2	0	1	0	N	2002	U	102.16	69.7	140.9	425.216			123.521	84.2741	170.362	0.696946	3.24351	0.7845	0	0	0.7845	0.7845	116.75	85.1743	346	1.5738	50.3237	33.8697	3.4819	33.9199	66.6771	266	38	5	0.0772705	0.0124911	0.0897617	0.106286	0.0436541	422	718	39	51	6	7	4162.26
c	Unuk-Bradfield	M	2	1	1	0	Y	2005	L				50	31	115	34.6428	21.4786	79.6785	1.68	10	0.5271	0.0657	0.03	0.5421	0.6078	472.776	99.7897	293	1.5643	52.7296	36.8356	0.7077	27.9029	57.5173	164	0	4	0.0568142	0.00138571	0.0582									3562.28
i	BOWRON	M	1	1	0	0	N	2001	U	30.9	25.7	42.3	76	63	104	30.5745	25.3447	41.8388	0.539474	1.47511	0.04	0.11	0.15	0.115	0.225	92.8557	126.13	401.724	0.0548	98.5436	95.3998	0.1004	4.1181	26.808	106	367	137	0.0426434	0.202757	0.245401	0.267115	0.782837	351	6890	687	10606	270	1724	2495.97
i	Cariboo	U2	1	1	0	0	N			0			0	0	10	0	0	1.44651	1	3.7	0.1021	0.1247	0	0.1021	0.2268	54.1302	136.076	340	1.36	98.6176	97.5283	0.2606	2.0447	14.508	23090	20880	1458	3.34	3.23122	6.57122									6983.22
i	Grid - 2006 N	M	1	1	0	0	N	2006	U				53	48	79	15.7456	14.2601	23.4698	0.584906	0.6	0.05	0.12	0.0155	0.05775	0.17775	145.279	113.183	316	-1.5997	57.913	48.1021	0.1639	12.8815	50.0504	688	1185	81	0.204395	0.376111	0.580506									4003.13
i	Grid - 2007	M	1	1	0	0	N	2007	U				94	82	134	13.5549	11.8245	19.3229	0.553191	0.43	0.05	0.12	0.0214	0.0607	0.1807	95.0202	121.246	296	-2.0093	67.0104	61.5285	0.0633	6.8453	34.2675	3746	5679	48	0.540176	0.825837	1.36601									8006.03
i	MIDSU	M	1	1	1	0	N	1985	U	27.1	24.3	31.1	67.6408			27.0687	24.5436	31.4118	0.250923	2.6	0.1	0.34	0	0.1	0.44	67.3989	107.231	245.091	-6.4384	45.543	20.037	0.7688	60.6948	97.3336	141	30	3	0.0564257	0.013206	0.0696318	0.0769611	0.0870002	321	1577	57	220	6	27	2523.91
i	MIDSU	M	1	1	1	0	N	1995	U	40.8	36	47.9	101.966			40.805	36.3609	48.3802	0.291667	5.8	0.1	0.34	0	0.1	0.44	67.3989	107.231	245.091	-6.4384	45.543	20.037	0.7688	60.6948	97.3336	141	30	3	0.0564257	0.013206	0.0696318	0.0769611	0.0870002	321	1577	57	220	6	27	2523.91
i	NATION	M	1	1	0	0	N	2003	L	5.7	5	7.1	40.8416			5.80911	5.09571	7.23591	0.368421	2.7	0	0.25	0.26	0.13	0.38	73.0097	129.987	294.347	-0.2749	99.7514	99.1406	0.0107	0.4119	6.9247	181			0.0257445	0	0.0257445	0.316029	0.373292	5394	10082		2720		266	7165.2
i	NELCHINA	M	1	0.5	1	0	N	1998	U	28.8	26.3	32.2	97.1148			29.4236	26.8695	32.8973	0.204861	8.90198	0.1072	0.3047	0	0.1072	0.4119	57.1837	105.48	209.243	-6.5051	22.1287	4.6237	0.7903	69.3478	92.4145	393	40	4	0.11907	0.013331	0.132401	0.140691	0.738948	758	22084	72	271	8	30	3372.04
i	NOA	M	1	0.5	1	1	N	1987	U	17.9	15.6	21	71.9664			18.1081	15.7813	21.2441	0.301676	1.86425	0.1231	0.2017	0	0.1231	0.3248	41.5244	113.048	153.693	-9.4359	24.8195	5.1472	0.4206	75.6324	97.8909	266	37	5	0.0669305	0.010568	0.0774985	0.0785155	0.0715728	461	1424	64	214	9	31	4020.47
i	NOME	M	1	0	1	1	N	1991	U	29.1	26.1	33.4	52.8086			29.7093	26.6465	34.0994	0.250859	6.02882	0.14	0	0	0.14	0.14	58.2745	111.807	157.186	-5.5472	3.0032	0.1956	1.6203	88.8811	97.0247	2478	17	2	1.39408	0.0106891	1.40477	1.18814	0.4296	3312	3996	30	94	4	13	1814.73
i	PARSNIP MTNS	M	1	1	0	0	N	2000	U	48.3	43	59	310.714			49.2141	43.8138	60.1165	0.331263	1.93014	0	0.02	0	0	0.02	135.033	124.01	318.332	-1.3069	81.3586	73.2162	0.2178	16.1489	54.6176	68	673	147	0.0107705	0.12988	0.140651	0.224336	0.467982	141	8032	2146	8642	724	3868	6433
i	South Chilicotin	U2	1	1	0	0	N			0			0	0	10	0	0	1.11619	1	3.7	0.0969	0.149	0	0.0969	0.2459	43.2931	133.126	312	0.9389	89.3554	84.1781	0.223	6.9588	31.0862	16624	30409	496	1.85555	3.44958	5.30513									8998.28
i	Thompson	U2	1	1	0	0	N			0			0	0	10	0	0	2.16162	1	3.7	0.0165	0.174	0.051	0.042	0.216	58.7056	133.271	300	4.6241	89.8194	85.6618	1.9518	12.6892	28.963	98969	42608	7669	21.3933	10.868	32.2612									4789.75
i	AKR	M	0	0.5	1	0	N	1986	U	10.1	8.5	17.1	79.8194			11.5164	9.692	19.498	0.851485	9.62628	0	0.34	0	0	0.34	69.0395	98.4958	242.67	-8.2094	42.628	25.8723	0.62	38.7973	77.3258	495	24	10	0.0714188	0.00490553	0.0763243	0.0884256	0.2194	955	9722	38	156	16	46	7902.91
i	AKR	M	0	0.5	1	0	N	1992	U	14.6	12.2	19.7	115.382			16.6474	13.9109	22.4626	0.513699	6.38667	0	0.34	0	0	0.34	69.0395	98.4958	242.67	-8.2094	42.628	25.8723	0.62	38.7973	77.3258	495	24	10	0.0714188	0.00490553	0.0763243	0.0884256	0.2194	955	9722	38	156	16	46	7902.91
i	Alberta BMA 4	M	0	1	0	0	N	2005	U				37.4	33	44	3.35739	2.96241	3.94988	0.294118	8.6	0	0.3809	0	0	0.3809	67.6677	131.861	388.988	-0.5684	82.8355	78.8636	0.2277	10.4041	27.7674	14430	63001	4753	1.29538	6.08227	7.37765									11285.8
i	Alberta BMA 5	M	0	1	0	0	N	2006	U				40	26	65	4.45262	2.8942	7.23551	0.975	6	0	0.4071	0	0	0.4071	58.4754	128.529	439.563	1.5632	37.3546	31.5508	0.32	42.7912	76.5595	38021	342836	10994	4.23233	39.3868	43.6191									11285.8
i	Alberta BMA 6	M	0	1	0	0	N	2007	U				34	23	58	11.0631	7.48389	18.8724	1.02941	7.4	0	0.3464	0	0	0.3464	81.0306	130.564	438.337	0.7935	46.0456	41.4646	0.5126	45.8584	70.5858	11864	68958	5110	3.86038	24.1007	27.9611									11285.8
i	ALSEK	M	0	1	0	0	N	1969	H	30	25.5	47.3	31.8714			38.8477	33.0205	61.2498	0.726667	0	0	0.148	0	0	0.148	54.4907	103.732	186.209	-5.9677	47.7715	34.7558	0.1185	18.2314	61.854	3			0.00365666	0	0.00365666	0.171489	0.0616154	548	619					1062.38
i	ANDERSON	M	0	0	0	1	N	1989	U	10.1	8.9	11.9	171.129			10.5096	9.26093	12.3826	0.29703	2.10795	0	0.5601	0	0	0.5601	15.9767	106.122	169.582	-13.3499	19.1912	1.4359	0.0534	69.5166	97.8339				0	0	0	0	0.000654435		60					16943.5
i	ANWR	M	0	0	1	1	Y	1985	L	15.9			115	86	230	20.379	15.24	40.758	1.25218	0.0946223	0	0.32	0	0	0.32	22.8757	82.0222	97.0131	-8.7667	0.2922	0.0044	0.0392	16.2487	96.0795	43	53	8	0.00761998	0.0108097	0.0184297	0.017839	0.0112665	55	117	72	162	10	23	7232.69
i	BANFF	M	0	1	0	0	Y	1995	L	12			82.572	41	164	14.2741	7.0876	28.3504	1.48961	1.57	0	0.33	0	0	0.33	123.341	109.154	332.649	-3.9254	47.756	40.5062	0.0037	5.8122	41.2049	8641	92	20	1.49376	0.0193613	1.51312	1.87795	2.25667	19788	48387	1632	44076	503	4164	6880.96
i	BERLAND	M	0	1	0	0	N	1981-83	L	5.8			58.4173	29	116	5.81009	2.88429	11.5372	1.48928	7.9	0	0.3159	0	0	0.3159	64.8241	133.965	349.822	-0.1507	99.7042	99.1947	0	0.4176	6.8948	189	847	1334	0.0187976	0.216919	0.235716	0.253755	1.02912	473	28349	1428	24462	1914	4835	10072
i	BROCK-HORNADAY	M	0	0	0	1	N	1992-93	U	8.5			107.506	54	216	8.95366	4.4974	17.9896	1.50689	0	0	0.5817	0	0	0.5817	16.8	103.362	147.351	-12.879	7.1898	1.6461	0	29.8063	93.2688	286			0.0238195	0	0.0238195	0.0202553	0.0116889	286	286					12647.8
i	CABINET YAAK	M	0	1	0	0	N	2000	L	6.5			43.4647	22	88	6.51438	3.2973	13.1892	1.51847	1.15	0	0.1816	0	0	0.1816	106.165	135.743	415.684	3.6667	96.5774	93.8971	0.0825	3.5912	20.7865	10717	8959	8604	1.60624	2.6323	4.23853	4.8626	5.15917	30686	100960	18309	63598	15362	40666	6686.88
i	Central Alberta	U2	0	0	0	0	N			0			0	0	5	0	0	0.766828	0.5	3.7	0	0.464	0	0	0.464	51.349	128.195	420	2.401	21.4634	15.4619	3.6622	82.7472	93.569	57812	334378	12387	8.86637	53.1818	62.0482									6525.87
i	Central Purcell	M	0	1	0	0	N	2000	U				85	65	117	19.5853	14.977	26.9586	0.611765	2.8	0	0.0866	0.0001	5e-05	0.08665	115.489	120.79	286.353	-0.875	69.8273	60.9013	0.0218	8.3047	47.3053	4437	893	29	1.02235	0.212443	1.2348									4619.04
i	CORONATION GULF	M	0	0	0	1	N	1991	U	4.5			97.5771	49	195	4.67943	2.34985	9.35146	1.49625	2	0	0.5806	0	0	0.5806	24.9	101.906	167.958	-10.8272	6.2438	0.872	0.0012	76.5606	98.8541				0	0	0	0	0							21683.8
i	CROWSNEST HWY 2002	M	0	1	0	0	N	2002	L				33	17	66	36.6618	18.8864	73.3236	1.48485	5.77	0	0.294	0	0	0.294	77.146	130.751	434.439	-0.8519	83.3288	78.8868	0	4.3597	37.5651	1972	2786	60	2.19082	3.1618	5.35262	6.69952	11.196	10106	28294	7717	148588	336	6297	900.12
i	CROWSNEST HWY 2003	M	0	1	0	0	N	2003	L				55	27	110	55.0094	27.0046	110.019	1.50909	5.72	0	0.1239	0	0	0.1239	99.1506	131.531	397.586	0.1154	86.0967	81.4374	0.347	11.0037	42.2553	8382	1352	51	8.38343	1.40324	9.78666	6.46598	6.54035	11357	49822	3558	50007	162	4505	1000.33
i	Denali83	M	0	0.5	1	0	Y	1983	H	32			92.79	46	186	38.881	19.275	77.9381	1.50878	0	0	0.2293	0	0	0.2293	71.3846	95.1239	235.927	-7.8571	26.1854	11.2921	0.5916	37.5804	71.6539	141	9	4	0.0590821	0.00544728	0.0645294	0.0619877	0.0548358	251	975	19	105	7	28	2899.66
i	DENALI95	M	0	0.5	1	0	Y	1995	U	37.1	33.8	40.4	72.07			37.7787	34.4168	41.1372	0.177898	0	0	0.18	0	0	0.18	78.1142	107.501	276.982	-10.6786	45.8487	15.9059	0.979	66.3064	95.054	94	6	3	0.0492743	0.00471775	0.053992	0.060894	0.0504965	214	837	14	98	6	27	1942.5
i	Donjek	M	0	1	0	0	N		L				23	12	46	5.64493	2.94518	11.2899	1.47826	0	0	0.1064	0	0	0.1064	84.2414	90.3066	175.519	-8.7176	37.6952	23.6695	0.0259	20.3054	55.9174	89			0.0218434	0	0.0218434	0.0205464	0.0111339	121	217		23		3	5789.08
i	DOWNIE	M	0	1	0	0	N	1982	L	31.3			33.9289	17	68	33.6887	16.8796	67.5186	1.50314	2.65	0	0.0996	0.0409	0.02045	0.12005	175.451	121.289	342.175	-0.5806	73.1961	62.1415	0.1388	16.0962	64.2692	51	44	0	0.0506389	0.0436885	0.0943274	0.0910892	0.530083	119	8506	104	694	1	434	1083.99
i	EBKR	M	0	0	1	1	N	1975	L	6.8			30.5801	23	61	9.58566	7.2096	19.1211	1.24264	0.221249	0	0.3861	0	0	0.3861	45.6591	88.2015	99.7009	-16.8769	5.6776	0.647	0	17.256	49.3698	28	42	6	0.00877691	0.0150461	0.023823	0.0232996	0.0182208	50	174	75	250	11	37	4497.07
i	ELK VALLEY	M	0	1	0	0	N	1997	H				150	93	286	63.0226	39.074	120.163	1.28667	2.98	0	0.11	0	0	0.11	97.122	125.025	424.415	-2.3056	75.6004	68.4375	0	5.3956	38.7566	4783	820	112	2.00958	0.39158	2.40116	2.83175	5.92103	8296	30362	7498	122907	215	5534	2401.56
i	FLATHEAD	M	0	1	0	0	N	1997	L				156	73	277	44.3973	20.7756	78.8336	1.30769	4.6	0	0.12	0	0	0.12	112.05	129.693	408.515	0.3725	87.0146	81.4678	0.1138	8.7185	45.3776	8247	2122	137	2.34708	0.642907	2.98999	3.00722	8.19992	12671	60572	5253	181273	2508	18334	3513.73
i	FLATHEAD	M	0	1	0	0	N	2007	U				178	129	271	50.6584	36.7131	77.126	0.797753	2.9	0	0.12	0	0	0.12	112.05	129.693	408.515	0.3725	87.0146	81.4678	0.1138	8.7185	45.3776	8247	2122	137	2.34708	0.642907	2.98999	3.00722	8.19992	12671	60572	5253	181273	2508	18334	3513.73
i	Flathead Lake	U2	0	1	0	0	N			0			0	0	10	0	0	1.5522	1	3.7	0	0.2133	0	0	0.2133	59.0956	125.545	389	4.0051	80.9223	74.0731	0.2599	15.2343	52.1758	50463	19716	8962	7.83287	4.4514	12.2843									6801.28
i	FLATHEAD96	M	0	1	0	0	N	1996	H	64.6			51	26	102	64.6396	32.9535	129.279	1.4902	3.2	0	0.1673	0	0	0.1673	122.233	129.382	410.994	0.4783	85.2195	79.0352	0.0618	10.3278	50.6493	25	209	37	0.0316861	0.311791	0.343477	0.783231	8.09843	258	26048	1125	100793	749	11436	789.23
i	GNP BC	M	0	1	0	0	Y	?	L	35			45.5	23	92	39.5793	20.0071	80.0285	1.51648	0	0	0.0663	0.0246	0.0123	0.0786	198.701	114.297	352.478	-3.1053	59.6929	48.2342	0.0384	15.3551	58.9059	20	24	8	0.0173975	0.027836	0.0452335	0.251393	0.805343	637	14875	357	1517	15	83	1300.34
i	GNP MONTANA	M	0	1	0	0	Y	1967-71	H	47.3			195.734	98	392	48.4416	24.2538	97.0151	1.50204	1.03	0	0.21	0	0	0.21	141.706	125.598	443.168	-1.2605	73.055	63.2886	0.1839	11.9245	48.8689	215	11033	5458	0.0532098	4.08131	4.13452	4.75045	9.58023	4244	95174	23194	174650	9472	34864	4138.13
i	GNP MONTANA	M	0	1	0	0	Y	2000	U				170	119	241	42.0729	29.451	59.6445	0.717647	0.1	0	0.21	0	0	0.21	141.706	125.598	443.168	-1.2605	73.055	63.2886	0.1839	11.9245	48.8689	215	11033	5458	0.0532098	4.08131	4.13452	4.75045	9.58023	4244	95174	23194	174650	9472	34864	4138.13
i	GRANDBY	M	0	1	0	0	N	1997	U	8.4	5.8	18.7	37.5551			8.5628	5.91241	19.0624	1.53571	2.39158	0	0.18	0	0	0.18	79.7848	133.733	355.164	2.5076	98.4438	96.1238	0.0684	2.7019	21.929	3010	2700	601	0.6863	0.752649	1.43895	3.01383	6.16319	21760	151858	7970	52062	1388	6194	4470.84
i	HINTON	M	0	1	0	0	N	1999	U	17.9	12	32	95.8882			18.5187	12.4148	33.1061	1.11732	1.67	0	0.37	0.0007	0.00035	0.37035	91.6014	123.542	344.011	-2.3205	72.4996	67.0052	0.0234	4.4695	26.4426	2531	1912	513	0.488807	0.468336	0.957143	1.37867	1.05636	10616	16204	2452	6961	896	3091	5356.88
i	ISKUT	M	0	1	0	0	N	2004	H	31	25.8	38.8	121.28			47.3734	39.4269	59.2932	0.419355	2.14	0	0.11	0	0	0.11	182.355	87.1445	328.767	-2.1579	39.4881	28.6635	0.2553	18.2984	47.747	12			0.00468735	0	0.00468735	0.00469792	0.00758038	22	204		0		3	3912.25
i	Jasper	M	0	1	0	0	Y	1975-78	L	10.8			14.65	7	29	12.1174	5.78986	23.9866	1.50171	7.6	0	0.3095	0	0	0.3095	121.142	108.868	321.987	-4.4595	36.2645	27.7665	0	7.9069	44.7996	7	7	3	0.00578986	0.00827123	0.0140611	0.174446	0.479774	51	5385	463	2872	221	1644	1356.26
i	JUMBO	M	0	1	0	0	N	1998	U				37	32	45	25.9091	22.4079	31.5111	0.351351	5.64972	0	0.0788	0	0	0.0788	138.714	113.511	278.896	-0.6383	56.5481	47.1764	0.0454	10.2801	49.1143	224	1	7	0.156855	0.00560197	0.162457	0.328479	0.842654	796	13399	518	3849	15	177	1651.33
i	KANANASKIS	M	0	1	0	0	Y	1980-84	L	16.2			109.853	55	220	16.4246	8.22325	32.893	1.502	3.7	0	0.3907	0	0	0.3907	87.2581	126.867	428.9	-2.196	78.4077	72.8083	0.0185	5.289	33.1535	6251	16802	742	0.93461	2.62307	3.55768	4.9984	32.6772	12531	1020786	47187	484036	2252	17727	6781.07
i	KLUANE - ROB DNA	M	0	1	0	0	Y	1996	U	32.5			26	13	52	28.5138	14.2569	57.0275	1.5	0	0	0.1192	0	0	0.1192	57.653	108.38	207.03	-5.7931	51.3567	33.7198	1.036	27.5037	77.0844	0			0	0	0	0.122935	0.0523921	368	592					1025.63
i	LAC DE GRAS	M	0	0	0	1	N	1999	L	3.5			39.0474	20	80	4.54907	2.33003	9.32011	1.5366	1.6	0	0.5593	0	0	0.5593	27.2	93.1176	147.058	-10.7295	15.6567	5.0268	0.0902	82.2302	99.1355				0	0	0	0	0							11156.4
i	Lake Athabasca	U2	0	1	0	0	N			0			0	0	5	0	0	0.632317	0.5	3.7	0	0.4	0	0	0.4	45.2	114.795	228	-5.004	96.7123	87.611	0.0032	1.6091	67.5307	500	0	0	0.0632317	0	0.0632317									8479.19
i	MACKENZIE MNTS	M	0	0.5	0	0	N	1973-77	L	11.6			31.4744	16	34	12.8558	6.53523	13.8874	0.571893	1.85	0	0.11	0	0	0.11	68.1796	107.076	230.643	-11.5556	18.8374	2.511	0.092	32.5147	73.3904				0	0	0	0	3.67537e-05	0	1					2713.31
i	NAHANNI	M	0	1	0	0	Y	2003	H	22.2			69.5961	35	140	26.6086	13.3815	53.526	1.5087	0	0	0.11	0	0	0.11	68.7005	100.04	235.818	-10.4176	46.4895	30.2415	0.0725	18.9211	69.7343	0			0	0	0	0	6.77719e-05	0	2					3134.96
i	NC SELKIRKS	M	0	1	0	0	N	1996	U	48.1	30	90	216.016			49.2774	30.7343	92.2029	1.2474	3.13643	0	0.03	0	0	0.03	134.202	124.356	369.149	1.7761	82.9466	74.679	0.1183	10.3965	50.8504	3447	85	88	0.786327	0.0394646	0.825792	0.816768	1.00906	5532	24923	287	3493	141	779	4490.97
i	NCAlberta	U2	0	1	0	0	N			0			0	0	5	0	0	0.753028	0.5	3.7	0	0.4689	0	0	0.4689	47.9482	135.545	372	-1.0816	99.9285	99.6652	0	0.1655	6.7785	83	0	0	0.0125003	0	0.0125003									6737.77
i	NCDE	M	0	1	0	0	N	2005	U				765	715	831	33.4429	31.257	36.3281	0.151634	4	0	0.206	0	0	0.206	111.956	130.217	422.807	1.3031	81.1247	75.2388	0.1154	10.023	44.266	21217	101054	30453	0.927526	5.74898	6.67651	7.55289	9.59595	58476	241730	147150	409394	39630	85886	23106.7
i	NORDEGG-Alberta BMA 3	M	0	1	0	0	N	2004	U				42	36	55	2.53581	2.17355	3.3207	0.452381	9.3	0	0.345	0	0	0.345	69.7382	132.378	392.335	-0.2114	92.5536	90.9751	0.0104	1.1548	10.5019	13756	10933	3152	0.830538	0.850402	1.68094	2.85399	6.05481	33168	74209	49734	384237	4926	17956	16798
i	NORTH YUKON	M	0	0	0	1	N	1974	H	28			75.9091	38	152	28.0777	14.0556	56.2226	1.5018	0	0	0.4393	0	0	0.4393	28.1518	112.964	122.751	-12.2785	4.5082	0.1198	0.4702	72.5638	97.603				0	0	0	0	0							2711.04
i	PARSNIP PLATEAU	M	0	1	0	0	N	2000	U	16.6	10	40	50.2326			16.8395	10.1443	40.5771	1.80723	3.2	0	0.32	0	0	0.32	90.1316	131.546	333.75	0.7882	99.9171	99.5024	0.0083	0.3234	9.3955	268		2	0.0898418	0.000670461	0.0905123	0.076747	0.836937	381	15115		9229	7	514	3026.06
i	PEACE	U2	0	1	0	0	N	2003		0			0	0	10	0	0	1.78902	1	3.7	0	0.1807	0	0	0.1807	48.2474	127.392	339.696	0.8841	73.3181	58.5525	1.8832	38.6652	63.4371	26842	47544	883	4.80209	8.66369	13.4658	11.5752	8.73161	28547	53528	64675	149895	1498	5380	5609.4
i	Peace River	U2	0	1	0	0	N			0			0	0	5	0	0	0.627428	0.5	3.7	0	0.3932	0	0	0.3932	46.6535	129.684	291	-2.0962	88.6891	84.4749	0.047	10.2676	31.373	7664	12720	85	0.961722	1.60684	2.56857									8156.31
i	PROPHET MTNS	M	0	1	0	0	N	1998	U	22.5	20	29	70.0636			23.8796	21.2263	30.7781	0.4	11.418	0	0.2449	0	0	0.2449	65.6035	116.512	274.395	-5.4022	67.7634	57.0259	0.0963	17.3822	55.3487	3		173	0.00102248	0.0589631	0.0599855	0.0599723	0.102007	5	144		1381	327	1106	3113.94
i	PROPHET PLATEAU	M	0	1	0	0	N	1998	U	10	7	16	54.138			10.038	7.02658	16.0608	0.9	8.49806	0	0.3076	0	0	0.3076	54.6081	132.457	324.642	-2.6369	99.8472	99.5184	0.037	0.3751	3.1489	6		291	0.00111249	0.0539556	0.0550681	0.0602991	0.102412	116	357	14	2058	444	1151	5413.8
i	RICHARDSON MTNS	M	0	0	0	1	N	1995	U	19			138.335	69	276	19.1523	9.55298	38.2119	1.49637	0	0	0.4621	0	0	0.4621	35.5103	113.219	140.817	-12.375	10.2483	1.0331	1.7012	76.2905	96.7905				0	0	0	0	0.0269522		1393					7280.84
i	SC SELKIRK	M	0	1	0	0	N	1996	U	18.6	12	37	104.93			19.0757	12.3069	37.9462	1.34409	3.08631	0	0.03	0	0	0.03	114.123	129.664	368.981	1.7301	89.1176	82.6154	0.0635	5.94	35.6489	15519	808	269	2.82127	0.195793	3.01707	4.14653	3.33228	40748	70843	1214	11869	332	1817	5641.38
i	South Okanagan	U2	0	1	0	0	N			0			0	0	5	0	0	1.25407	0.5	4.63	0	0.1489	0.0265	0.01325	0.16215	59.7371	132.345	307	2.2435	94.5472	87.3704	0.2124	8.3573	31.5865	4750	8050	686	1.19137	2.19112	3.38248									3990.99
i	South Purcell	M	0	1	0	0	N	2003	U				88	69	113	12.8828	10.1013	16.5427	0.5	3.9	0	0.1211	0	0	0.1211	92.5885	130.419	320.711	0.7206	89.2246	81.1057	0.0658	7.7755	38.6875	25642	7669	273	3.75388	1.16267	4.91655									6897.65
i	South Selkirk	M	0	1	0	0	N	2005	U				58	50	70	14.48	12.4828	17.4759	0.344828	2.1	0.0102	0.0845	0.0084	0.0144	0.0989	113.821	134.231	354.897	2.4483	96.0295	91.1225	0.1311	5.8372	30.1473	26211	3742	31	6.54372	0.94195	7.48567									4074.17
i	SOUTH SELKIRKS	M	0	1	0	0	N	1985-90	L	14			54.581	27	110	14.3742	7.11058	28.969	1.52068	1.8	0	0	0	0	0	120.64	132.716	365.081	2.5217	93.4467	87.9703	0.1707	8.2146	33.4493	8667	6806	1362	2.2825	2.15108	4.43358	6.05706	5.84334	31809	106579	13243	32332	2598	9837	3898.64
i	SW Alberta Foothills	U2	0	0	0	0	N			0			0	0	10	0	0	2.55577	1	3.7	0	0.3182	0	0	0.3182	56.9197	126.915	440	2.2881	11.3326	8.4387	0.5047	58.8092	93.976	10141	150094	7281	2.59181	40.2215	42.8133									3925.71
i	SW YUKON	M	0	1	0	0	N	1985	U	15.8			96.4299	48	192	16.9046	8.41463	33.6585	1.49331	0.75	0	0.2804	0	0	0.2804	49.5067	107.279	173.306	-4.4056	51.3419	32.9013	0.0333	28.3881	78.2547	4480			0.785366	0	0.785366	1.73868	1.08011	20795	22507		0		1	6103.16
i	SWAN HILLS	M	0	1	0	0	N	1977	L	7.2			18	9	36	5.84957	2.92478	11.6991	1.5	18.5	0	0.3731	0	0	0.3731	62.6409	131.602	397.351	0.0111	99.792	98.5919	0	0.8641	12.441	1937	1360	293	0.629479	0.537185	1.16666	1.21648	4.70089	2221	30467	4353	100974	684	8005	3078.87
i	SWAN MTNS	M	0	1	0	0	N	1995	L	18.3			28.0958	21	56	18.5463	13.8623	36.9661	1.24574	7.3	0	0.22	0	0	0.22	120.409	132.485	425.826	1.5814	94.2548	91.021	0.1641	6.3526	33.4865	5648	5193	2023	3.7283	4.76335	8.49165	13.0837	11.2208	35313	96656	14315	81371	5077	24969	1535.29
i	TANANA	M	0	1	1	0	N	1986	U	16			81.987	41	162	16	8.00126	31.6148	1.47584	3.1	0	0.34	0	0	0.34	33.6019	111.574	225.296	-8.1892	92.8028	69.9055	0	18.3754	90.9853	116	16	7	0.0226377	0.00448851	0.0271262	0.0270283	0.0629808	188	2090	26	84	11	36	5124.19
i	TUKTOYUKTUK	M	0	0	0	1	N	1977	L	4.5			65.7941	33	132	5.92805	2.9733	11.8932	1.50469	10.6504	0	0.5286	0	0	0.5286	17.6872	77.2139	186.56	-9.7643	35.4404	10.2852	0.5774	49.8557	88.6677	419			0.0377519	0	0.0377519	0.166963	0.0942281	3824	3824					14620.9
i	Upper Columbia	U2	0	1	0	0	N			0			0	0	5	0	0	0.701945	0.5	3.7	0	0.17	0	0	0.17	68.2337	133.778	371	4.7204	91.1861	77.3807	0.4072	16.9609	41.0369	25794	24988	2401	3.62119	3.84511	7.4663									7244.08
i	UPSU	M	0	0.5	1	0	N	1979	U	14.6	8.3	35.7	28.3541			18.7015	10.6317	45.729	1.87671	6.7	0	0.3225	0	0	0.3225	98.6782	88.8627	245.431	-8.5714	25.2826	0.9892	0.1028	49.6274	74.2035	53	18	3	0.0349572	0.013851	0.0488082	0.0569086	0.0661745	145	1119	35	136	5	25	1942.06
i	UPSU	M	0	0.5	1	0	N	1987	L	10.7	8.8	14.3	20.0032			13.1935	11.2721	18.3172	0.514019	20.14	0	0.3225	0	0	0.3225	98.6782	88.8627	245.431	-8.5714	25.2826	0.9892	0.1028	49.6274	74.2035	53	18	3	0.0349572	0.013851	0.0488082	0.0569086	0.0661745	145	1119	35	136	5	25	1942.06
i	WATERTON	M	0	1	0	0	Y	1997	U	15	12	20	75.6267			15.0478	12.0382	20.0637	0.533333	5.83168	0	0.5	0	0	0.5	83.4114	130.599	441.637	0.1429	73.7318	67.038	0.2288	20.2407	49.264	7608	51968	3749	1.5138	11.0863	12.6001	14.3748	19.1499	11059	71917	129359	598323	7392	35227	5041.78
i	WBKR	M	0	0	1	1	N	1980	L	22.8			141.41	106	212	22.87	17.1432	34.2863	0.749591	0.310641	0	0.36	0	0	0.36	44.6715	108.148	119.987	-12.4144	1.1124	0.0242	0	78.7764	98.5652	100	58	8	0.0161728	0.0106741	0.0268469	0.027528	0.0303404	168	635	91	277	13	40	6202.21
i	WBKR	M	0	0	1	1	N	1992	U	29.5	28.1	31.5	182.965			29.5906	28.1863	31.5967	0.115254	0.563473	0	0.36	0	0	0.36	44.6715	108.148	119.987	-12.4144	1.1124	0.0242	0	78.7764	98.5652	100	58	8	0.0161728	0.0106741	0.0268469	0.027528	0.0303404	168	635	91	277	13	40	6202.21
i	Wbnp	U2	0	1	0	0	Y			0			0	0	10	0	0	1.24838	1	3.7	0	0.4118	0	0	0.4118	43.985	127.549	273	-4.7915	98.8608	85.774	0.0187	11.4794	68.1273	3	0	66	0.000374515	0.00823932	0.00861383									8065.87
i	WEST SLOPES 96	M	0	1	0	0	N	1996	U	18.8	12.5	37.8	77.0708			20.2078	13.436	40.6305	1.34574	2.59724	0	0	0	0	0	124.549	119.337	324.777	-1.925	69.9841	61.8141	0.0367	9.1316	47.538	6088	676	24	1.59626	0.183538	1.7798	1.45705	0.947144	6666	15317	945	2592	39	330	4099.51
i	WEST SLOPES 97	M	0	1	0	0	N	1997	U	24.7	19.5	41.6	46.969			28.9243	22.835	48.7146	0.894737	1.91775	0	0	0	0	0	117.758	111.691	318.036	-2.1071	55.7559	45.9036	0.0653	12.3612	50.6207	194	19	11	0.119468	0.0184745	0.137943	1.10006	0.67078	5339	8628	207	1903	23	396	1901.58
i	Westlock	U2	0	1	0	0	N			0			0	0	5	0	0	1.13395	0.5	3.7	0	0.4813	0	0	0.4813	49.7036	127.717	400	1.4122	48.007	30.2701	2.2213	67.7341	84.3153	14538	120446	6661	3.29708	28.8267	32.1238									4433.97
i	Yahk	M	0	1	0	0	N	2004	U				20	16	25	7.45334	5.96267	9.31668	0.45	5	0	0.1557	0	0	0.1557	69.4919	136.622	339.279	2.3038	97.4549	94.1111	0.1486	3.3253	20.5183	18573	6518	254	6.92155	2.5237	9.44525									2718.97
i	YELLOWSTONE	M	0	1	0	0	Y	2000	U	20			177.218	86	354	20.8854	10.1352	41.7194	1.51226	1.4	0	0.44	0	0	0.44	93.5786	116.4	409.226	0.6388	65.4935	57.8623	0.0029	8.1142	58.5633	641	24011	26801	0.0755427	5.98826	6.0638	6.50405	7.62492	4311	25972	47017	192541	36660	84012	8860.92
i	YUKON NORTH SLOPE	M	0	0	0	1	N	2006	U				160	120	240	32.4264	24.3198	48.6396	0.75	1.4	0	0.49	0	0	0.49	20.1086	107.742	124.199	-10.5762	2.3508	0.1261	0.4288	67.5478	97.6441				0	0	0	0	0		0		0		0	5078.49
i	Northern Alberta_2008 survey	M	0	1	0	0	Y	2008	L	18.1	14.8	26.4	353	288	516	18.5111	15.1025	27.0587	0.645892		0	0.2494	0	0	0.2494	84.5619	126.782	302	-2.2608	81.5655	76.9303	0.0218	6.0794	26.6725	4231	78	2079	0.221871	0.113112	0.334982									19509.5
[truncated: 10 more columns]

## Sheet: Interior-extracted
int_coast	NAME	Type	Salmon_presence	blackbear	Alaska	Arctic	Park	Year	Bias	Density_naïve	LCI_den	UCI_den	POP_SIZE	LCI_Nhat	UCI_Nhat	Density_corrected	LCL_corrected	UCL_corrected	CI_relative	harv10	SALMON_AVG	MEAT_AVG	KOKAN_AVG	fish_all	allmeat	PRECIP	NDVI_AVG	AET_POLY	TEMP_AVG	TREE10PCT_	TREE25PCT_	HERB100PCT	HERB75PCT_	HERB50PCT_	HUMAN_CNT	CATTLE_CNT	SHEEP_CNT	hum_den	livestock_den	humcow_density	humcow10_density	humcow50_density	HUMANBUF10	HUMANBUF50	CATTLBUF10	CATTLBUF50	SHEEPBUF10	SHEEPBUF50	AREA_KM2
i	BOWRON	M	1	1	0	0	N	2001	U	30.9	25.7	42.3	76	63	104	30.5745	25.3447	41.8388	0.539474	1.47511	0.04	0.11	0.15	0.115	0.225	92.8557	126.13	401.724	0.0548	98.5436	95.3998	0.1004	4.1181	26.808	106	367	137	0.0426434	0.202757	0.245401	0.267115	0.782837	351	6890	687	10606	270	1724	2495.97
i	Cariboo	U2	1	1	0	0	N			0			0	0	10	0	0	1.44651	1	3.7	0.1021	0.1247	0	0.1021	0.2268	54.1302	136.076	340	1.36	98.6176	97.5283	0.2606	2.0447	14.508	23090	20880	1458	3.34	3.23122	6.57122									6983.22
i	Grid - 2006 N	M	1	1	0	0	N	2006	U				53	48	79	15.7456	14.2601	23.4698	0.584906	0.6	0.05	0.12	0.0155	0.05775	0.17775	145.279	113.183	316	-1.5997	57.913	48.1021	0.1639	12.8815	50.0504	688	1185	81	0.204395	0.376111	0.580506									4003.13
i	Grid - 2007	M	1	1	0	0	N	2007	U				94	82	134	13.5549	11.8245	19.3229	0.553191	0.43	0.05	0.12	0.0214	0.0607	0.1807	95.0202	121.246	296	-2.0093	67.0104	61.5285	0.0633	6.8453	34.2675	3746	5679	48	0.540176	0.825837	1.36601									8006.03
i	MIDSU	M	1	1	1	0	N	1985	U	27.1	24.3	31.1	67.6408			27.0687	24.5436	31.4118	0.250923	2.6	0.1	0.34	0	0.1	0.44	67.3989	107.231	245.091	-6.4384	45.543	20.037	0.7688	60.6948	97.3336	141	30	3	0.0564257	0.013206	0.0696318	0.0769611	0.0870002	321	1577	57	220	6	27	2523.91
i	MIDSU	M	1	1	1	0	N	1995	U	40.8	36	47.9	101.966			40.805	36.3609	48.3802	0.291667	5.8	0.1	0.34	0	0.1	0.44	67.3989	107.231	245.091	-6.4384	45.543	20.037	0.7688	60.6948	97.3336	141	30	3	0.0564257	0.013206	0.0696318	0.0769611	0.0870002	321	1577	57	220	6	27	2523.91
i	NATION	M	1	1	0	0	N	2003	L	5.7	5	7.1	40.8416			5.80911	5.09571	7.23591	0.368421	2.7	0	0.25	0.26	0.13	0.38	73.0097	129.987	294.347	-0.2749	99.7514	99.1406	0.0107	0.4119	6.9247	181			0.0257445	0	0.0257445	0.316029	0.373292	5394	10082		2720		266	7165.2
i	NELCHINA	M	1	0.5	1	0	N	1998	U	28.8	26.3	32.2	97.1148			29.4236	26.8695	32.8973	0.204861	8.90198	0.1072	0.3047	0	0.1072	0.4119	57.1837	105.48	209.243	-6.5051	22.1287	4.6237	0.7903	69.3478	92.4145	393	40	4	0.11907	0.013331	0.132401	0.140691	0.738948	758	22084	72	271	8	30	3372.04
i	NOA	M	1	0.5	1	1	N	1987	U	17.9	15.6	21	71.9664			18.1081	15.7813	21.2441	0.301676	1.86425	0.1231	0.2017	0	0.1231	0.3248	41.5244	113.048	153.693	-9.4359	24.8195	5.1472	0.4206	75.6324	97.8909	266	37	5	0.0669305	0.010568	0.0774985	0.0785155	0.0715728	461	1424	64	214	9	31	4020.47
i	NOME	M	1	0	1	1	N	1991	U	29.1	26.1	33.4	52.8086			29.7093	26.6465	34.0994	0.250859	6.02882	0.14	0	0	0.14	0.14	58.2745	111.807	157.186	-5.5472	3.0032	0.1956	1.6203	88.8811	97.0247	2478	17	2	1.39408	0.0106891	1.40477	1.18814	0.4296	3312	3996	30	94	4	13	1814.73
i	PARSNIP MTNS	M	1	1	0	0	N	2000	U	48.3	43	59	310.714			49.2141	43.8138	60.1165	0.331263	1.93014	0	0.02	0	0	0.02	135.033	124.01	318.332	-1.3069	81.3586	73.2162	0.2178	16.1489	54.6176	68	673	147	0.0107705	0.12988	0.140651	0.224336	0.467982	141	8032	2146	8642	724	3868	6433
i	South Chilicotin	U2	1	1	0	0	N			0			0	0	10	0	0	1.11619	1	3.7	0.0969	0.149	0	0.0969	0.2459	43.2931	133.126	312	0.9389	89.3554	84.1781	0.223	6.9588	31.0862	16624	30409	496	1.85555	3.44958	5.30513									8998.28
i	Thompson	U2	1	1	0	0	N			0			0	0	10	0	0	2.16162	1	3.7	0.0165	0.174	0.051	0.042	0.216	58.7056	133.271	300	4.6241	89.8194	85.6618	1.9518	12.6892	28.963	98969	42608	7669	21.3933	10.868	32.2612									4789.75
i	AKR	M	0	0.5	1	0	N	1986	U	10.1	8.5	17.1	79.8194			11.5164	9.692	19.498	0.851485	9.62628	0	0.34	0	0	0.34	69.0395	98.4958	242.67	-8.2094	42.628	25.8723	0.62	38.7973	77.3258	495	24	10	0.0714188	0.00490553	0.0763243	0.0884256	0.2194	955	9722	38	156	16	46	7902.91
i	AKR	M	0	0.5	1	0	N	1992	U	14.6	12.2	19.7	115.382			16.6474	13.9109	22.4626	0.513699	6.38667	0	0.34	0	0	0.34	69.0395	98.4958	242.67	-8.2094	42.628	25.8723	0.62	38.7973	77.3258	495	24	10	0.0714188	0.00490553	0.0763243	0.0884256	0.2194	955	9722	38	156	16	46	7902.91
i	Alberta BMA 4	M	0	1	0	0	N	2005	U				37.4	33	44	3.35739	2.96241	3.94988	0.294118	8.6	0	0.3809	0	0	0.3809	67.6677	131.861	388.988	-0.5684	82.8355	78.8636	0.2277	10.4041	27.7674	14430	63001	4753	1.29538	6.08227	7.37765									11285.8
i	Alberta BMA 5	M	0	1	0	0	N	2006	U				40	26	65	4.45262	2.8942	7.23551	0.975	6	0	0.4071	0	0	0.4071	58.4754	128.529	439.563	1.5632	37.3546	31.5508	0.32	42.7912	76.5595	38021	342836	10994	4.23233	39.3868	43.6191									11285.8
i	Alberta BMA 6	M	0	1	0	0	N	2007	U				34	23	58	11.0631	7.48389	18.8724	1.02941	7.4	0	0.3464	0	0	0.3464	81.0306	130.564	438.337	0.7935	46.0456	41.4646	0.5126	45.8584	70.5858	11864	68958	5110	3.86038	24.1007	27.9611									11285.8
i	ALSEK	M	0	1	0	0	N	1969	H	30	25.5	47.3	31.8714			38.8477	33.0205	61.2498	0.726667	0	0	0.148	0	0	0.148	54.4907	103.732	186.209	-5.9677	47.7715	34.7558	0.1185	18.2314	61.854	3			0.00365666	0	0.00365666	0.171489	0.0616154	548	619					1062.38
i	ANDERSON	M	0	0	0	1	N	1989	U	10.1	8.9	11.9	171.129			10.5096	9.26093	12.3826	0.29703	2.10795	0	0.5601	0	0	0.5601	15.9767	106.122	169.582	-13.3499	19.1912	1.4359	0.0534	69.5166	97.8339				0	0	0	0	0.000654435		60					16943.5
i	ANWR	M	0	0	1	1	Y	1985	L	15.9			115	86	230	20.379	15.24	40.758	1.25218	0.0946223	0	0.32	0	0	0.32	22.8757	82.0222	97.0131	-8.7667	0.2922	0.0044	0.0392	16.2487	96.0795	43	53	8	0.00761998	0.0108097	0.0184297	0.017839	0.0112665	55	117	72	162	10	23	7232.69
i	BANFF	M	0	1	0	0	Y	1995	L	12			82.572	41	164	14.2741	7.0876	28.3504	1.48961	1.57	0	0.33	0	0	0.33	123.341	109.154	332.649	-3.9254	47.756	40.5062	0.0037	5.8122	41.2049	8641	92	20	1.49376	0.0193613	1.51312	1.87795	2.25667	19788	48387	1632	44076	503	4164	6880.96
i	BERLAND	M	0	1	0	0	N	1981-83	L	5.8			58.4173	29	116	5.81009	2.88429	11.5372	1.48928	7.9	0	0.3159	0	0	0.3159	64.8241	133.965	349.822	-0.1507	99.7042	99.1947	0	0.4176	6.8948	189	847	1334	0.0187976	0.216919	0.235716	0.253755	1.02912	473	28349	1428	24462	1914	4835	10072
i	BROCK-HORNADAY	M	0	0	0	1	N	1992-93	U	8.5			107.506	54	216	8.95366	4.4974	17.9896	1.50689	0	0	0.5817	0	0	0.5817	16.8	103.362	147.351	-12.879	7.1898	1.6461	0	29.8063	93.2688	286			0.0238195	0	0.0238195	0.0202553	0.0116889	286	286					12647.8
i	CABINET YAAK	M	0	1	0	0	N	2000	L	6.5			43.4647	22	88	6.51438	3.2973	13.1892	1.51847	1.15	0	0.1816	0	0	0.1816	106.165	135.743	415.684	3.6667	96.5774	93.8971	0.0825	3.5912	20.7865	10717	8959	8604	1.60624	2.6323	4.23853	4.8626	5.15917	30686	100960	18309	63598	15362	40666	6686.88
i	Central Alberta	U2	0	0	0	0	N			0			0	0	5	0	0	0.766828	0.5	3.7	0	0.464	0	0	0.464	51.349	128.195	420	2.401	21.4634	15.4619	3.6622	82.7472	93.569	57812	334378	12387	8.86637	53.1818	62.0482									6525.87
i	Central Purcell	M	0	1	0	0	N	2000	U				85	65	117	19.5853	14.977	26.9586	0.611765	2.8	0	0.0866	0.0001	5e-05	0.08665	115.489	120.79	286.353	-0.875	69.8273	60.9013	0.0218	8.3047	47.3053	4437	893	29	1.02235	0.212443	1.2348									4619.04
i	CORONATION GULF	M	0	0	0	1	N	1991	U	4.5			97.5771	49	195	4.67943	2.34985	9.35146	1.49625	2	0	0.5806	0	0	0.5806	24.9	101.906	167.958	-10.8272	6.2438	0.872	0.0012	76.5606	98.8541				0	0	0	0	0							21683.8
i	CROWSNEST HWY 2002	M	0	1	0	0	N	2002	L				33	17	66	36.6618	18.8864	73.3236	1.48485	5.77	0	0.294	0	0	0.294	77.146	130.751	434.439	-0.8519	83.3288	78.8868	0	4.3597	37.5651	1972	2786	60	2.19082	3.1618	5.35262	6.69952	11.196	10106	28294	7717	148588	336	6297	900.12
i	CROWSNEST HWY 2003	M	0	1	0	0	N	2003	L				55	27	110	55.0094	27.0046	110.019	1.50909	5.72	0	0.1239	0	0	0.1239	99.1506	131.531	397.586	0.1154	86.0967	81.4374	0.347	11.0037	42.2553	8382	1352	51	8.38343	1.40324	9.78666	6.46598	6.54035	11357	49822	3558	50007	162	4505	1000.33
i	Denali83	M	0	0.5	1	0	Y	1983	H	32			92.79	46	186	38.881	19.275	77.9381	1.50878	0	0	0.2293	0	0	0.2293	71.3846	95.1239	235.927	-7.8571	26.1854	11.2921	0.5916	37.5804	71.6539	141	9	4	0.0590821	0.00544728	0.0645294	0.0619877	0.0548358	251	975	19	105	7	28	2899.66
i	DENALI95	M	0	0.5	1	0	Y	1995	U	37.1	33.8	40.4	72.07			37.7787	34.4168	41.1372	0.177898	0	0	0.18	0	0	0.18	78.1142	107.501	276.982	-10.6786	45.8487	15.9059	0.979	66.3064	95.054	94	6	3	0.0492743	0.00471775	0.053992	0.060894	0.0504965	214	837	14	98	6	27	1942.5
i	Donjek	M	0	1	0	0	N		L				23	12	46	5.64493	2.94518	11.2899	1.47826	0	0	0.1064	0	0	0.1064	84.2414	90.3066	175.519	-8.7176	37.6952	23.6695	0.0259	20.3054	55.9174	89			0.0218434	0	0.0218434	0.0205464	0.0111339	121	217		23		3	5789.08
i	DOWNIE	M	0	1	0	0	N	1982	L	31.3			33.9289	17	68	33.6887	16.8796	67.5186	1.50314	2.65	0	0.0996	0.0409	0.02045	0.12005	175.451	121.289	342.175	-0.5806	73.1961	62.1415	0.1388	16.0962	64.2692	51	44	0	0.0506389	0.0436885	0.0943274	0.0910892	0.530083	119	8506	104	694	1	434	1083.99
i	EBKR	M	0	0	1	1	N	1975	L	6.8			30.5801	23	61	9.58566	7.2096	19.1211	1.24264	0.221249	0	0.3861	0	0	0.3861	45.6591	88.2015	99.7009	-16.8769	5.6776	0.647	0	17.256	49.3698	28	42	6	0.00877691	0.0150461	0.023823	0.0232996	0.0182208	50	174	75	250	11	37	4497.07
i	ELK VALLEY	M	0	1	0	0	N	1997	H				150	93	286	63.0226	39.074	120.163	1.28667	2.98	0	0.11	0	0	0.11	97.122	125.025	424.415	-2.3056	75.6004	68.4375	0	5.3956	38.7566	4783	820	112	2.00958	0.39158	2.40116	2.83175	5.92103	8296	30362	7498	122907	215	5534	2401.56
i	FLATHEAD	M	0	1	0	0	N	1997	L				156	73	277	44.3973	20.7756	78.8336	1.30769	4.6	0	0.12	0	0	0.12	112.05	129.693	408.515	0.3725	87.0146	81.4678	0.1138	8.7185	45.3776	8247	2122	137	2.34708	0.642907	2.98999	3.00722	8.19992	12671	60572	5253	181273	2508	18334	3513.73
i	FLATHEAD	M	0	1	0	0	N	2007	U				178	129	271	50.6584	36.7131	77.126	0.797753	2.9	0	0.12	0	0	0.12	112.05	129.693	408.515	0.3725	87.0146	81.4678	0.1138	8.7185	45.3776	8247	2122	137	2.34708	0.642907	2.98999	3.00722	8.19992	12671	60572	5253	181273	2508	18334	3513.73
i	Flathead Lake	U2	0	1	0	0	N			0			0	0	10	0	0	1.5522	1	3.7	0	0.2133	0	0	0.2133	59.0956	125.545	389	4.0051	80.9223	74.0731	0.2599	15.2343	52.1758	50463	19716	8962	7.83287	4.4514	12.2843									6801.28
i	FLATHEAD96	M	0	1	0	0	N	1996	H	64.6			51	26	102	64.6396	32.9535	129.279	1.4902	3.2	0	0.1673	0	0	0.1673	122.233	129.382	410.994	0.4783	85.2195	79.0352	0.0618	10.3278	50.6493	25	209	37	0.0316861	0.311791	0.343477	0.783231	8.09843	258	26048	1125	100793	749	11436	789.23
i	GNP BC	M	0	1	0	0	Y	?	L	35			45.5	23	92	39.5793	20.0071	80.0285	1.51648	0	0	0.0663	0.0246	0.0123	0.0786	198.701	114.297	352.478	-3.1053	59.6929	48.2342	0.0384	15.3551	58.9059	20	24	8	0.0173975	0.027836	0.0452335	0.251393	0.805343	637	14875	357	1517	15	83	1300.34
i	GNP MONTANA	M	0	1	0	0	Y	1967-71	H	47.3			195.734	98	392	48.4416	24.2538	97.0151	1.50204	1.03	0	0.21	0	0	0.21	141.706	125.598	443.168	-1.2605	73.055	63.2886	0.1839	11.9245	48.8689	215	11033	5458	0.0532098	4.08131	4.13452	4.75045	9.58023	4244	95174	23194	174650	9472	34864	4138.13
i	GNP MONTANA	M	0	1	0	0	Y	2000	U				170	119	241	42.0729	29.451	59.6445	0.717647	0.1	0	0.21	0	0	0.21	141.706	125.598	443.168	-1.2605	73.055	63.2886	0.1839	11.9245	48.8689	215	11033	5458	0.0532098	4.08131	4.13452	4.75045	9.58023	4244	95174	23194	174650	9472	34864	4138.13
i	GRANDBY	M	0	1	0	0	N	1997	U	8.4	5.8	18.7	37.5551			8.5628	5.91241	19.0624	1.53571	2.39158	0	0.18	0	0	0.18	79.7848	133.733	355.164	2.5076	98.4438	96.1238	0.0684	2.7019	21.929	3010	2700	601	0.6863	0.752649	1.43895	3.01383	6.16319	21760	151858	7970	52062	1388	6194	4470.84
i	HINTON	M	0	1	0	0	N	1999	U	17.9	12	32	95.8882			18.5187	12.4148	33.1061	1.11732	1.67	0	0.37	0.0007	0.00035	0.37035	91.6014	123.542	344.011	-2.3205	72.4996	67.0052	0.0234	4.4695	26.4426	2531	1912	513	0.488807	0.468336	0.957143	1.37867	1.05636	10616	16204	2452	6961	896	3091	5356.88
i	ISKUT	M	0	1	0	0	N	2004	H	31	25.8	38.8	121.28			47.3734	39.4269	59.2932	0.419355	2.14	0	0.11	0	0	0.11	182.355	87.1445	328.767	-2.1579	39.4881	28.6635	0.2553	18.2984	47.747	12			0.00468735	0	0.00468735	0.00469792	0.00758038	22	204		0		3	3912.25
i	Jasper	M	0	1	0	0	Y	1975-78	L	10.8			14.65	7	29	12.1174	5.78986	23.9866	1.50171	7.6	0	0.3095	0	0	0.3095	121.142	108.868	321.987	-4.4595	36.2645	27.7665	0	7.9069	44.7996	7	7	3	0.00578986	0.00827123	0.0140611	0.174446	0.479774	51	5385	463	2872	221	1644	1356.26
i	JUMBO	M	0	1	0	0	N	1998	U				37	32	45	25.9091	22.4079	31.5111	0.351351	5.64972	0	0.0788	0	0	0.0788	138.714	113.511	278.896	-0.6383	56.5481	47.1764	0.0454	10.2801	49.1143	224	1	7	0.156855	0.00560197	0.162457	0.328479	0.842654	796	13399	518	3849	15	177	1651.33
i	KANANASKIS	M	0	1	0	0	Y	1980-84	L	16.2			109.853	55	220	16.4246	8.22325	32.893	1.502	3.7	0	0.3907	0	0	0.3907	87.2581	126.867	428.9	-2.196	78.4077	72.8083	0.0185	5.289	33.1535	6251	16802	742	0.93461	2.62307	3.55768	4.9984	32.6772	12531	1020786	47187	484036	2252	17727	6781.07
i	KLUANE - ROB DNA	M	0	1	0	0	Y	1996	U	32.5			26	13	52	28.5138	14.2569	57.0275	1.5	0	0	0.1192	0	0	0.1192	57.653	108.38	207.03	-5.7931	51.3567	33.7198	1.036	27.5037	77.0844	0			0	0	0	0.122935	0.0523921	368	592					1025.63
i	LAC DE GRAS	M	0	0	0	1	N	1999	L	3.5			39.0474	20	80	4.54907	2.33003	9.32011	1.5366	1.6	0	0.5593	0	0	0.5593	27.2	93.1176	147.058	-10.7295	15.6567	5.0268	0.0902	82.2302	99.1355				0	0	0	0	0							11156.4
i	Lake Athabasca	U2	0	1	0	0	N			0			0	0	5	0	0	0.632317	0.5	3.7	0	0.4	0	0	0.4	45.2	114.795	228	-5.004	96.7123	87.611	0.0032	1.6091	67.5307	500	0	0	0.0632317	0	0.0632317									8479.19
i	MACKENZIE MNTS	M	0	0.5	0	0	N	1973-77	L	11.6			31.4744	16	34	12.8558	6.53523	13.8874	0.571893	1.85	0	0.11	0	0	0.11	68.1796	107.076	230.643	-11.5556	18.8374	2.511	0.092	32.5147	73.3904				0	0	0	0	3.67537e-05	0	1					2713.31
i	NAHANNI	M	0	1	0	0	Y	2003	H	22.2			69.5961	35	140	26.6086	13.3815	53.526	1.5087	0	0	0.11	0	0	0.11	68.7005	100.04	235.818	-10.4176	46.4895	30.2415	0.0725	18.9211	69.7343	0			0	0	0	0	6.77719e-05	0	2					3134.96
i	NC SELKIRKS	M	0	1	0	0	N	1996	U	48.1	30	90	216.016			49.2774	30.7343	92.2029	1.2474	3.13643	0	0.03	0	0	0.03	134.202	124.356	369.149	1.7761	82.9466	74.679	0.1183	10.3965	50.8504	3447	85	88	0.786327	0.0394646	0.825792	0.816768	1.00906	5532	24923	287	3493	141	779	4490.97
i	NCAlberta	U2	0	1	0	0	N			0			0	0	5	0	0	0.753028	0.5	3.7	0	0.4689	0	0	0.4689	47.9482	135.545	372	-1.0816	99.9285	99.6652	0	0.1655	6.7785	83	0	0	0.0125003	0	0.0125003									6737.77
i	NCDE	M	0	1	0	0	N	2005	U				765	715	831	33.4429	31.257	36.3281	0.151634	4	0	0.206	0	0	0.206	111.956	130.217	422.807	1.3031	81.1247	75.2388	0.1154	10.023	44.266	21217	101054	30453	0.927526	5.74898	6.67651	7.55289	9.59595	58476	241730	147150	409394	39630	85886	23106.7
i	NORDEGG-Alberta BMA 3	M	0	1	0	0	N	2004	U				42	36	55	2.53581	2.17355	3.3207	0.452381	9.3	0	0.345	0	0	0.345	69.7382	132.378	392.335	-0.2114	92.5536	90.9751	0.0104	1.1548	10.5019	13756	10933	3152	0.830538	0.850402	1.68094	2.85399	6.05481	33168	74209	49734	384237	4926	17956	16798
i	NORTH YUKON	M	0	0	0	1	N	1974	H	28			75.9091	38	152	28.0777	14.0556	56.2226	1.5018	0	0	0.4393	0	0	0.4393	28.1518	112.964	122.751	-12.2785	4.5082	0.1198	0.4702	72.5638	97.603				0	0	0	0	0							2711.04
i	PARSNIP PLATEAU	M	0	1	0	0	N	2000	U	16.6	10	40	50.2326			16.8395	10.1443	40.5771	1.80723	3.2	0	0.32	0	0	0.32	90.1316	131.546	333.75	0.7882	99.9171	99.5024	0.0083	0.3234	9.3955	268		2	0.0898418	0.000670461	0.0905123	0.076747	0.836937	381	15115		9229	7	514	3026.06
i	PEACE	U2	0	1	0	0	N	2003		0			0	0	10	0	0	1.78902	1	3.7	0	0.1807	0	0	0.1807	48.2474	127.392	339.696	0.8841	73.3181	58.5525	1.8832	38.6652	63.4371	26842	47544	883	4.80209	8.66369	13.4658	11.5752	8.73161	28547	53528	64675	149895	1498	5380	5609.4
i	Peace River	U2	0	1	0	0	N			0			0	0	5	0	0	0.627428	0.5	3.7	0	0.3932	0	0	0.3932	46.6535	129.684	291	-2.0962	88.6891	84.4749	0.047	10.2676	31.373	7664	12720	85	0.961722	1.60684	2.56857									8156.31
i	PROPHET MTNS	M	0	1	0	0	N	1998	U	22.5	20	29	70.0636			23.8796	21.2263	30.7781	0.4	11.418	0	0.2449	0	0	0.2449	65.6035	116.512	274.395	-5.4022	67.7634	57.0259	0.0963	17.3822	55.3487	3		173	0.00102248	0.0589631	0.0599855	0.0599723	0.102007	5	144		1381	327	1106	3113.94
i	PROPHET PLATEAU	M	0	1	0	0	N	1998	U	10	7	16	54.138			10.038	7.02658	16.0608	0.9	8.49806	0	0.3076	0	0	0.3076	54.6081	132.457	324.642	-2.6369	99.8472	99.5184	0.037	0.3751	3.1489	6		291	0.00111249	0.0539556	0.0550681	0.0602991	0.102412	116	357	14	2058	444	1151	5413.8
i	RICHARDSON MTNS	M	0	0	0	1	N	1995	U	19			138.335	69	276	19.1523	9.55298	38.2119	1.49637	0	0	0.4621	0	0	0.4621	35.5103	113.219	140.817	-12.375	10.2483	1.0331	1.7012	76.2905	96.7905				0	0	0	0	0.0269522		1393					7280.84
i	SC SELKIRK	M	0	1	0	0	N	1996	U	18.6	12	37	104.93			19.0757	12.3069	37.9462	1.34409	3.08631	0	0.03	0	0	0.03	114.123	129.664	368.981	1.7301	89.1176	82.6154	0.0635	5.94	35.6489	15519	808	269	2.82127	0.195793	3.01707	4.14653	3.33228	40748	70843	1214	11869	332	1817	5641.38
i	South Okanagan	U2	0	1	0	0	N			0			0	0	5	0	0	1.25407	0.5	4.63	0	0.1489	0.0265	0.01325	0.16215	59.7371	132.345	307	2.2435	94.5472	87.3704	0.2124	8.3573	31.5865	4750	8050	686	1.19137	2.19112	3.38248									3990.99
i	South Purcell	M	0	1	0	0	N	2003	U				88	69	113	12.8828	10.1013	16.5427	0.5	3.9	0	0.1211	0	0	0.1211	92.5885	130.419	320.711	0.7206	89.2246	81.1057	0.0658	7.7755	38.6875	25642	7669	273	3.75388	1.16267	4.91655									6897.65
i	South Selkirk	M	0	1	0	0	N	2005	U				58	50	70	14.48	12.4828	17.4759	0.344828	2.1	0.0102	0.0845	0.0084	0.0144	0.0989	113.821	134.231	354.897	2.4483	96.0295	91.1225	0.1311	5.8372	30.1473	26211	3742	31	6.54372	0.94195	7.48567									4074.17
i	SOUTH SELKIRKS	M	0	1	0	0	N	1985-90	L	14			54.581	27	110	14.3742	7.11058	28.969	1.52068	1.8	0	0	0	0	0	120.64	132.716	365.081	2.5217	93.4467	87.9703	0.1707	8.2146	33.4493	8667	6806	1362	2.2825	2.15108	4.43358	6.05706	5.84334	31809	106579	13243	32332	2598	9837	3898.64
i	SW Alberta Foothills	U2	0	0	0	0	N			0			0	0	10	0	0	2.55577	1	3.7	0	0.3182	0	0	0.3182	56.9197	126.915	440	2.2881	11.3326	8.4387	0.5047	58.8092	93.976	10141	150094	7281	2.59181	40.2215	42.8133									3925.71
i	SW YUKON	M	0	1	0	0	N	1985	U	15.8			96.4299	48	192	16.9046	8.41463	33.6585	1.49331	0.75	0	0.2804	0	0	0.2804	49.5067	107.279	173.306	-4.4056	51.3419	32.9013	0.0333	28.3881	78.2547	4480			0.785366	0	0.785366	1.73868	1.08011	20795	22507		0		1	6103.16
i	SWAN HILLS	M	0	1	0	0	N	1977	L	7.2			18	9	36	5.84957	2.92478	11.6991	1.5	18.5	0	0.3731	0	0	0.3731	62.6409	131.602	397.351	0.0111	99.792	98.5919	0	0.8641	12.441	1937	1360	293	0.629479	0.537185	1.16666	1.21648	4.70089	2221	30467	4353	100974	684	8005	3078.87
i	SWAN MTNS	M	0	1	0	0	N	1995	L	18.3			28.0958	21	56	18.5463	13.8623	36.9661	1.24574	7.3	0	0.22	0	0	0.22	120.409	132.485	425.826	1.5814	94.2548	91.021	0.1641	6.3526	33.4865	5648	5193	2023	3.7283	4.76335	8.49165	13.0837	11.2208	35313	96656	14315	81371	5077	24969	1535.29
i	TANANA	M	0	1	1	0	N	1986	U	16			81.987	41	162	16	8.00126	31.6148	1.47584	3.1	0	0.34	0	0	0.34	33.6019	111.574	225.296	-8.1892	92.8028	69.9055	0	18.3754	90.9853	116	16	7	0.0226377	0.00448851	0.0271262	0.0270283	0.0629808	188	2090	26	84	11	36	5124.19
i	TUKTOYUKTUK	M	0	0	0	1	N	1977	L	4.5			65.7941	33	132	5.92805	2.9733	11.8932	1.50469	10.6504	0	0.5286	0	0	0.5286	17.6872	77.2139	186.56	-9.7643	35.4404	10.2852	0.5774	49.8557	88.6677	419			0.0377519	0	0.0377519	0.166963	0.0942281	3824	3824					14620.9
i	Upper Columbia	U2	0	1	0	0	N			0			0	0	5	0	0	0.701945	0.5	3.7	0	0.17	0	0	0.17	68.2337	133.778	371	4.7204	91.1861	77.3807	0.4072	16.9609	41.0369	25794	24988	2401	3.62119	3.84511	7.4663									7244.08
i	UPSU	M	0	0.5	1	0	N	1979	U	14.6	8.3	35.7	28.3541			18.7015	10.6317	45.729	1.87671	6.7	0	0.3225	0	0	0.3225	98.6782	88.8627	245.431	-8.5714	25.2826	0.9892	0.1028	49.6274	74.2035	53	18	3	0.0349572	0.013851	0.0488082	0.0569086	0.0661745	145	1119	35	136	5	25	1942.06
i	UPSU	M	0	0.5	1	0	N	1987	L	10.7	8.8	14.3	20.0032			13.1935	11.2721	18.3172	0.514019	20.14	0	0.3225	0	0	0.3225	98.6782	88.8627	245.431	-8.5714	25.2826	0.9892	0.1028	49.6274	74.2035	53	18	3	0.0349572	0.013851	0.0488082	0.0569086	0.0661745	145	1119	35	136	5	25	1942.06
i	WATERTON	M	0	1	0	0	Y	1997	U	15	12	20	75.6267			15.0478	12.0382	20.0637	0.533333	5.83168	0	0.5	0	0	0.5	83.4114	130.599	441.637	0.1429	73.7318	67.038	0.2288	20.2407	49.264	7608	51968	3749	1.5138	11.0863	12.6001	14.3748	19.1499	11059	71917	129359	598323	7392	35227	5041.78
i	WBKR	M	0	0	1	1	N	1980	L	22.8			141.41	106	212	22.87	17.1432	34.2863	0.749591	0.310641	0	0.36	0	0	0.36	44.6715	108.148	119.987	-12.4144	1.1124	0.0242	0	78.7764	98.5652	100	58	8	0.0161728	0.0106741	0.0268469	0.027528	0.0303404	168	635	91	277	13	40	6202.21
i	WBKR	M	0	0	1	1	N	1992	U	29.5	28.1	31.5	182.965			29.5906	28.1863	31.5967	0.115254	0.563473	0	0.36	0	0	0.36	44.6715	108.148	119.987	-12.4144	1.1124	0.0242	0	78.7764	98.5652	100	58	8	0.0161728	0.0106741	0.0268469	0.027528	0.0303404	168	635	91	277	13	40	6202.21
i	Wbnp	U2	0	1	0	0	Y			0			0	0	10	0	0	1.24838	1	3.7	0	0.4118	0	0	0.4118	43.985	127.549	273	-4.7915	98.8608	85.774	0.0187	11.4794	68.1273	3	0	66	0.000374515	0.00823932	0.00861383									8065.87
i	WEST SLOPES 96	M	0	1	0	0	N	1996	U	18.8	12.5	37.8	77.0708			20.2078	13.436	40.6305	1.34574	2.59724	0	0	0	0	0	124.549	119.337	324.777	-1.925	69.9841	61.8141	0.0367	9.1316	47.538	6088	676	24	1.59626	0.183538	1.7798	1.45705	0.947144	6666	15317	945	2592	39	330	4099.51
i	WEST SLOPES 97	M	0	1	0	0	N	1997	U	24.7	19.5	41.6	46.969			28.9243	22.835	48.7146	0.894737	1.91775	0	0	0	0	0	117.758	111.691	318.036	-2.1071	55.7559	45.9036	0.0653	12.3612	50.6207	194	19	11	0.119468	0.0184745	0.137943	1.10006	0.67078	5339	8628	207	1903	23	396	1901.58
i	Westlock	U2	0	1	0	0	N			0			0	0	5	0	0	1.13395	0.5	3.7	0	0.4813	0	0	0.4813	49.7036	127.717	400	1.4122	48.007	30.2701	2.2213	67.7341	84.3153	14538	120446	6661	3.29708	28.8267	32.1238									4433.97
i	Yahk	M	0	1	0	0	N	2004	U				20	16	25	7.45334	5.96267	9.31668	0.45	5	0	0.1557	0	0	0.1557	69.4919	136.622	339.279	2.3038	97.4549	94.1111	0.1486	3.3253	20.5183	18573	6518	254	6.92155	2.5237	9.44525									2718.97
i	YELLOWSTONE	M	0	1	0	0	Y	2000	U	20			177.218	86	354	20.8854	10.1352	41.7194	1.51226	1.4	0	0.44	0	0	0.44	93.5786	116.4	409.226	0.6388	65.4935	57.8623	0.0029	8.1142	58.5633	641	24011	26801	0.0755427	5.98826	6.0638	6.50405	7.62492	4311	25972	47017	192541	36660	84012	8860.92
i	YUKON NORTH SLOPE	M	0	0	0	1	N	2006	U				160	120	240	32.4264	24.3198	48.6396	0.75	1.4	0	0.49	0	0	0.49	20.1086	107.742	124.199	-10.5762	2.3508	0.1261	0.4288	67.5478	97.6441				0	0	0	0	0		0		0		0	5078.49
i	Northern Alberta_2008 survey	M	0	1	0	0	Y	2008	L	18.1	14.8	26.4	353	288	516	18.5111	15.1025	27.0587	0.645892		0	0.2494	0	0	0.2494	84.5619	126.782	302	-2.2608	81.5655	76.9303	0.0218	6.0794	26.6725	4231	78	2079	0.221871	0.113112	0.334982									19509.5
																																																	5894.15
[truncated: 10 more columns]
